# Supplementary material for: Disentangling the aging gene expression network of termite queens
Source: PubMed Central journal article supplement (PMC8114706; doi:10.1186/s12864-021-07649-4), 2021-05-11
Supplement: 12864_2021_7649_MOESM1_ESM.pdf [file 12864_2021_7649_MOESM1_ESM.pdf]

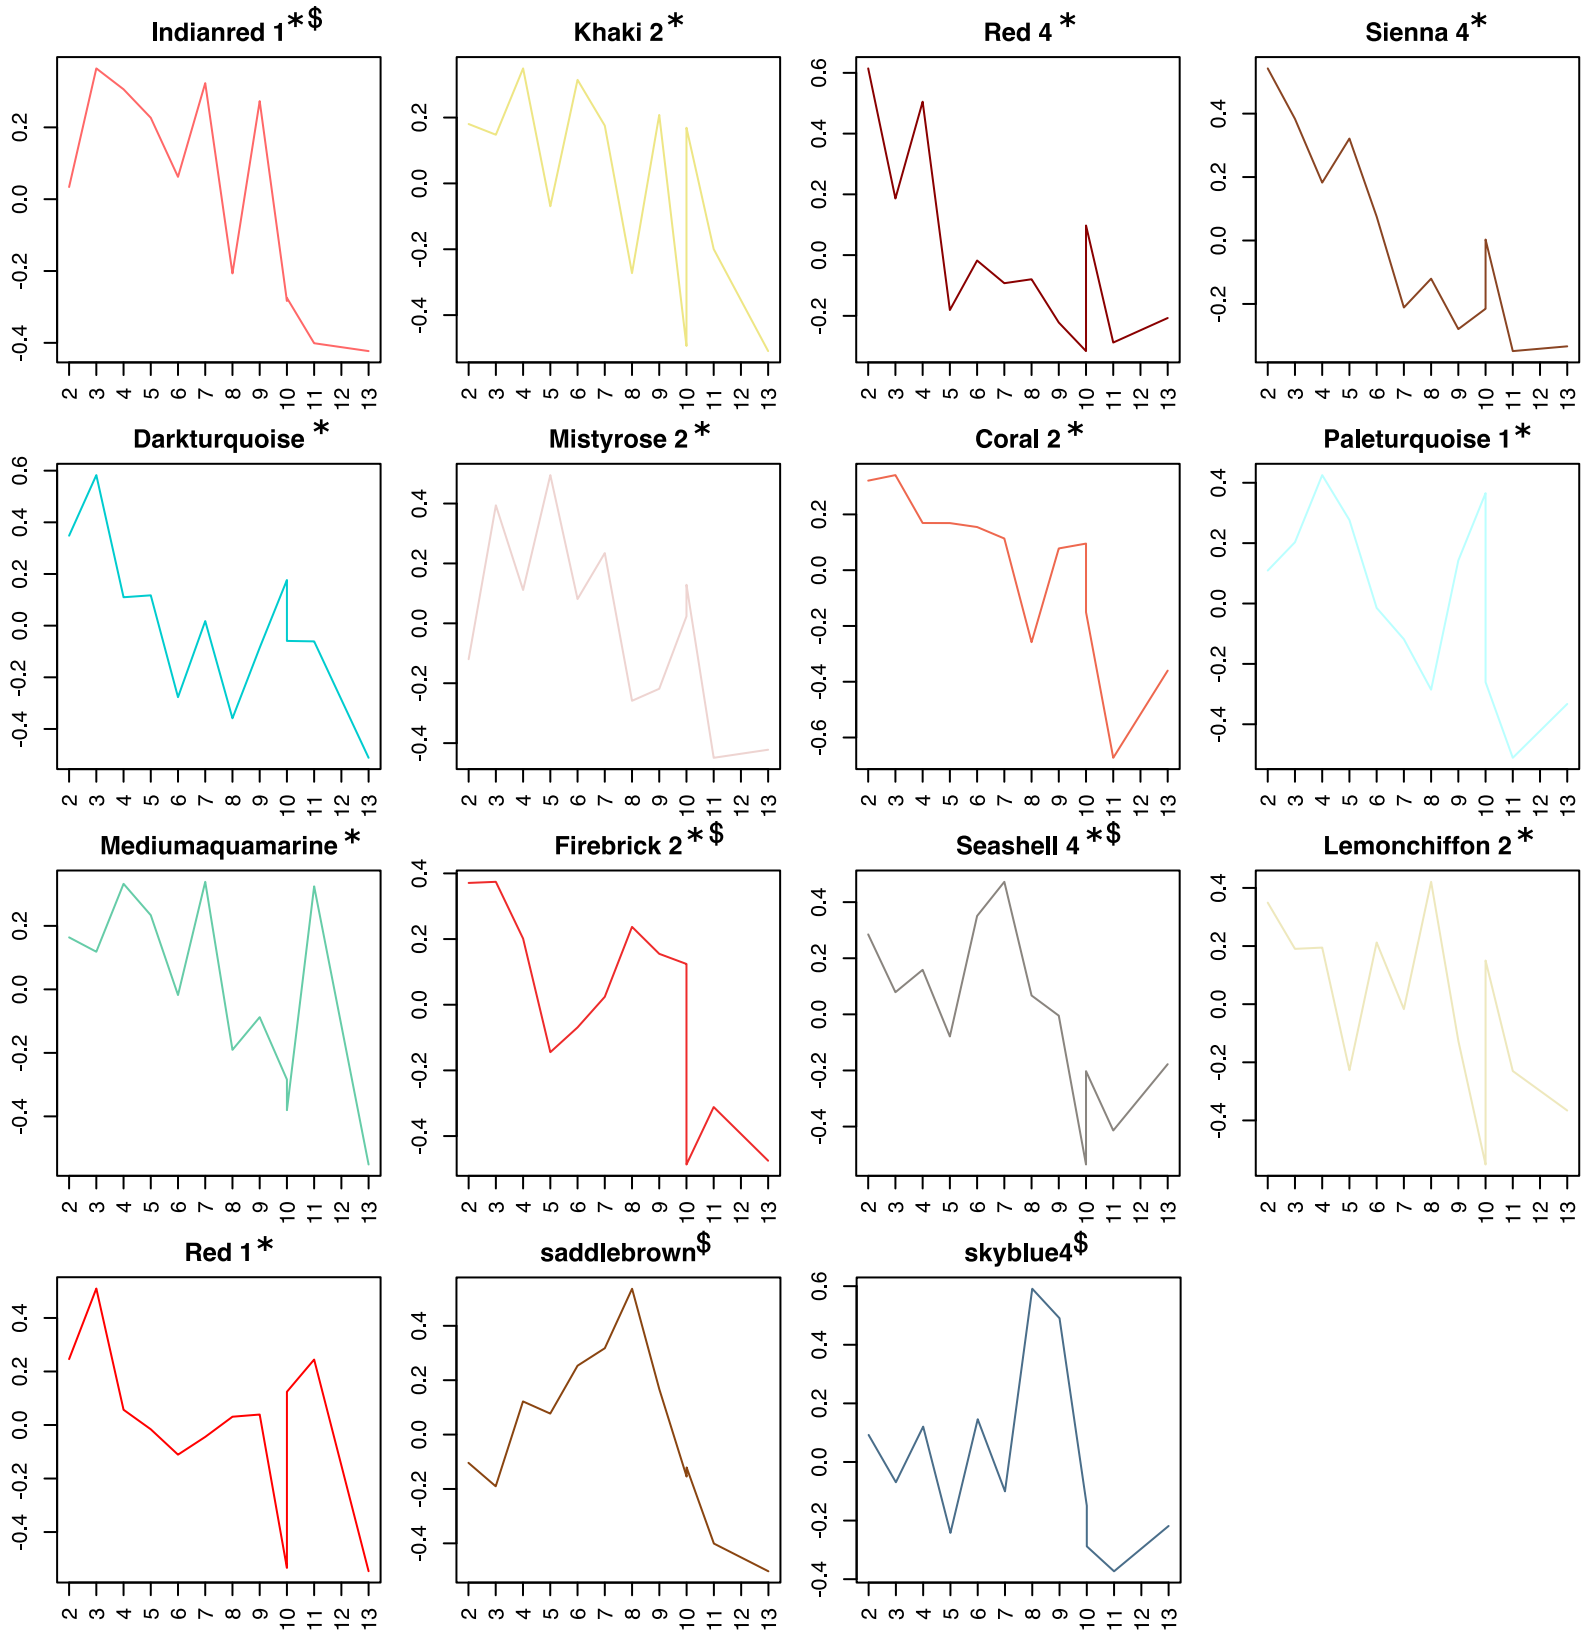

**Figure S2: WGCNA modules of co-expressed transcripts that negatively correlate with age.**

Modules are named after colors by WGCNA. Eigengenes of all these modules showed a negative correlation with age while \* indicates that the age-correlation was significant. Modules marked with <sup>\$</sup> were found in the young subnetwork.

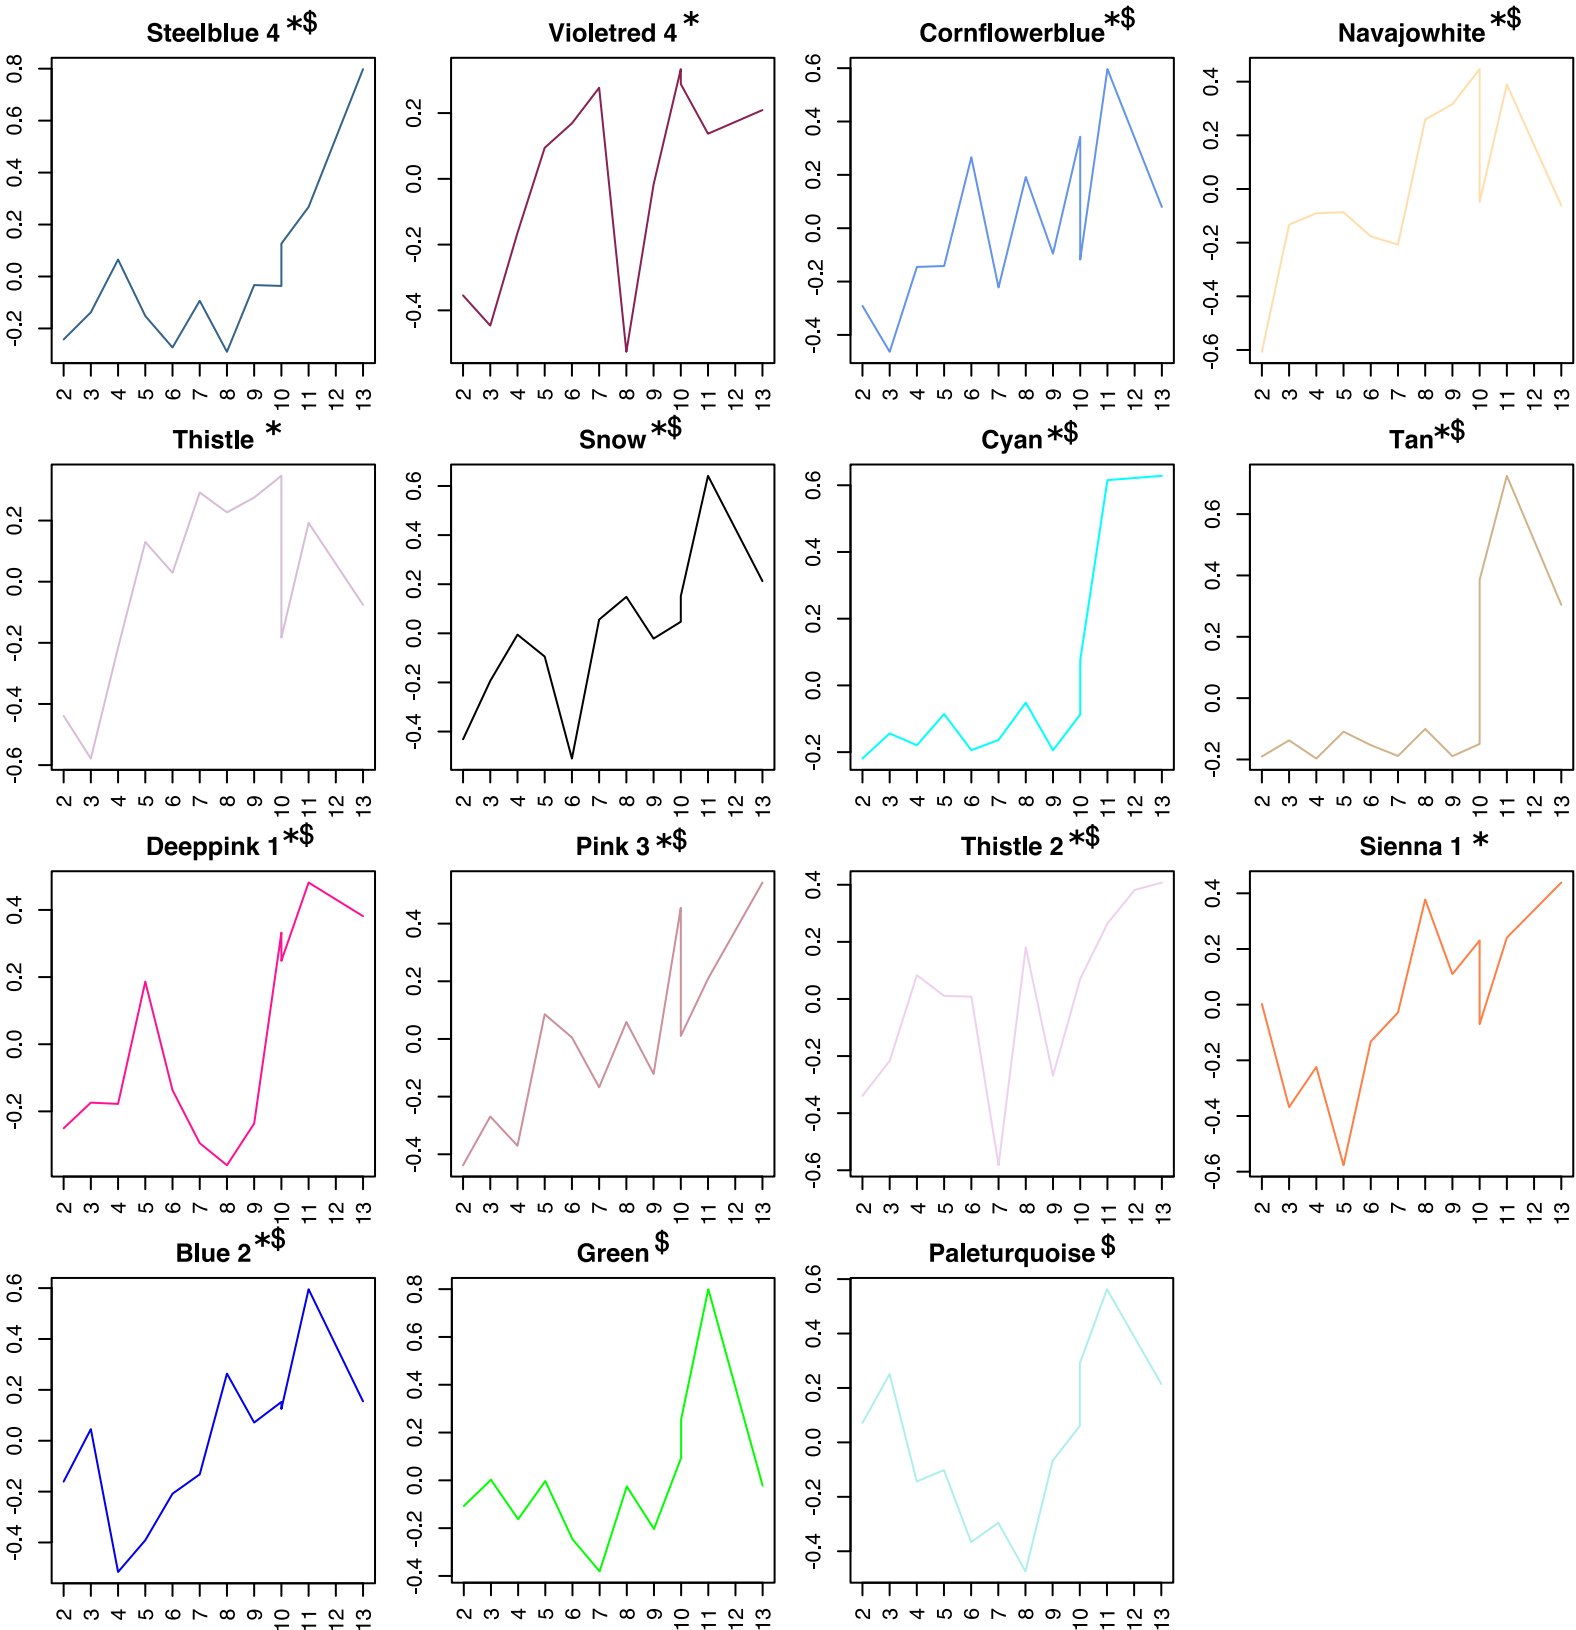

**Figure S3: WGCNA modules of co-expressed transcripts that positively correlate with age.**

Modules are named after colors by WGCNA. Eigengenes of all these modules showed a positive correlation with age; \* indicates that the age-correlation was significant. Additionally, modules marked with \$ were found in the old subnetwork.

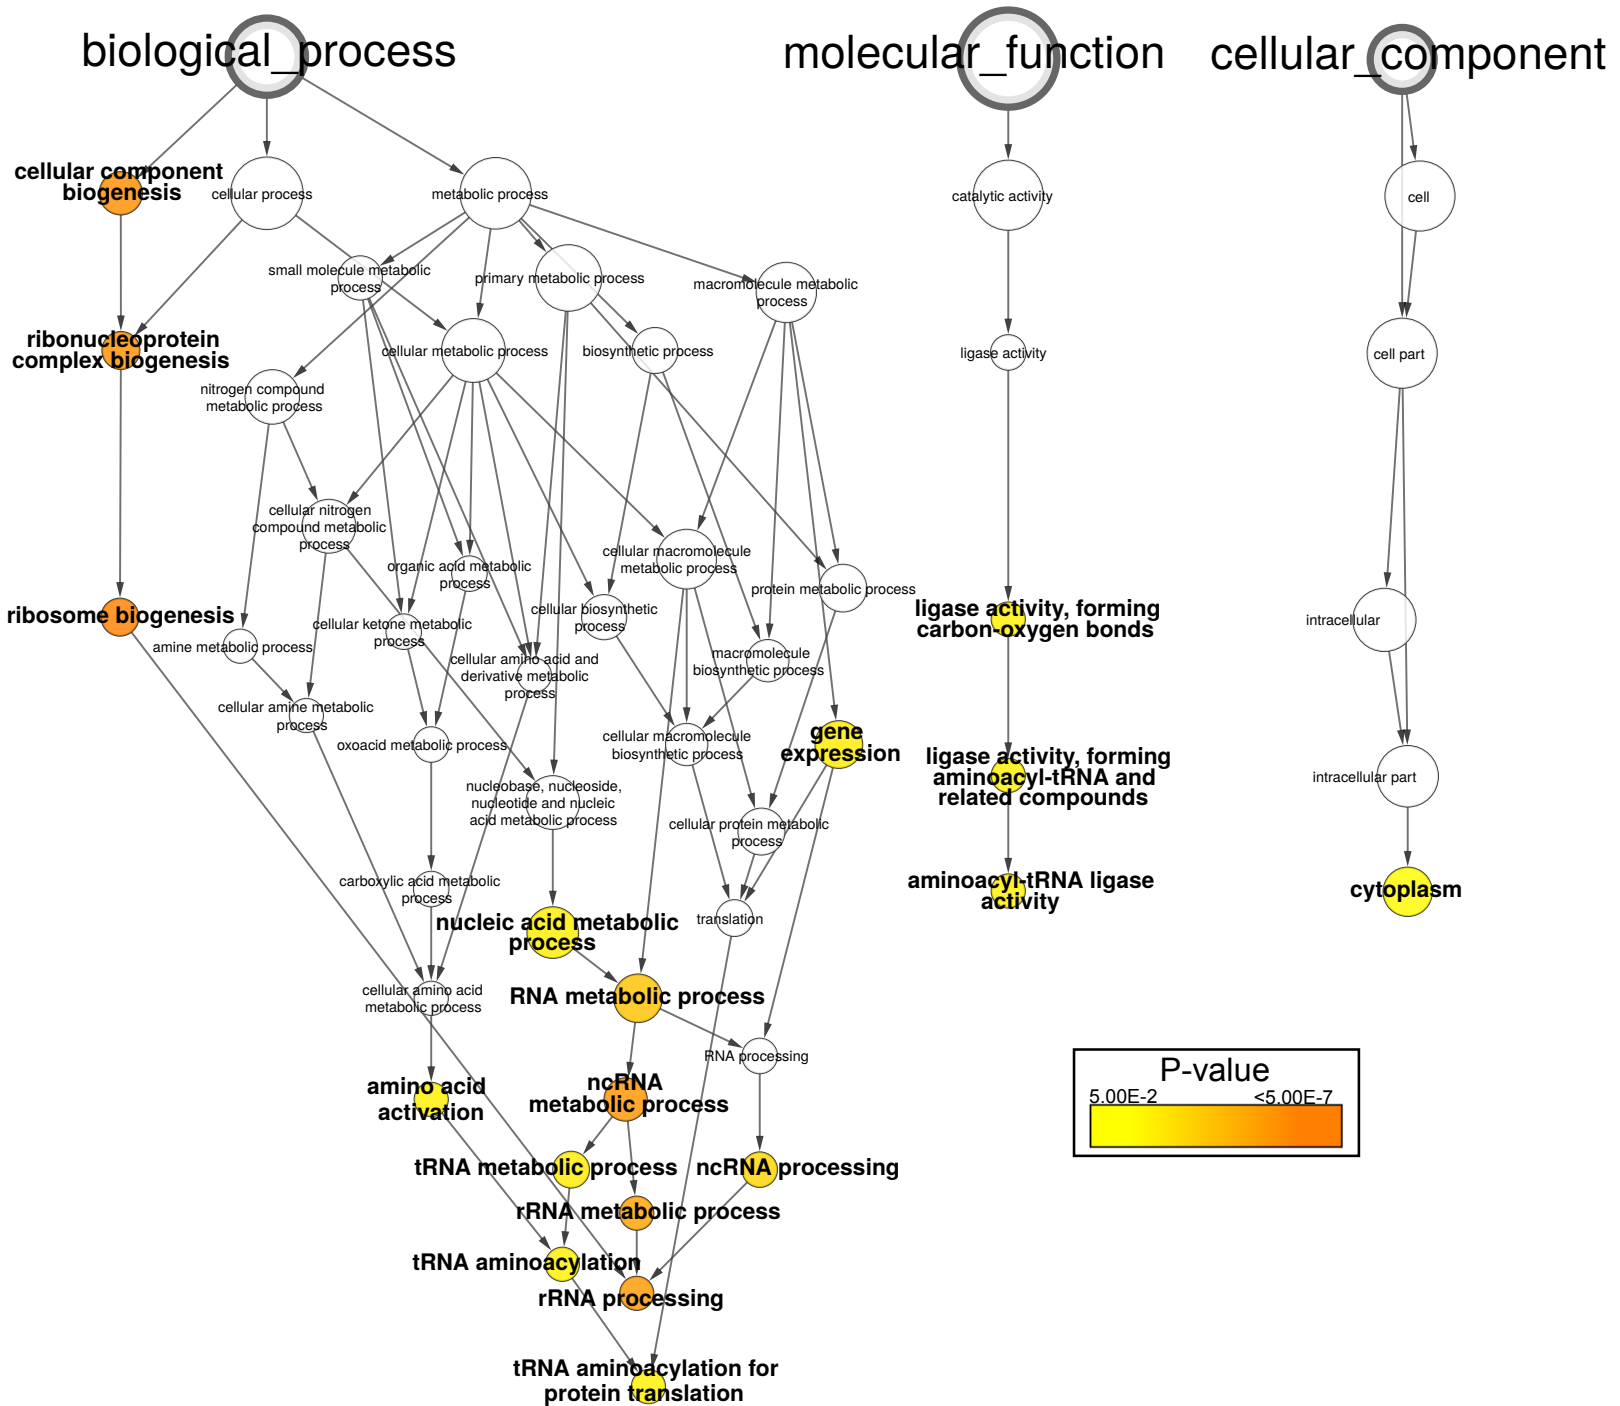

**Figure S4: GO enrichment for the WGCNA module ‘tan’ that positively correlated with age and which had many old-age DETs.**  
 Details are shown for BP (Biological Process), which revealed an enrichment of transcripts for ribosomal and tRNA related functions.

### Old subnetworks

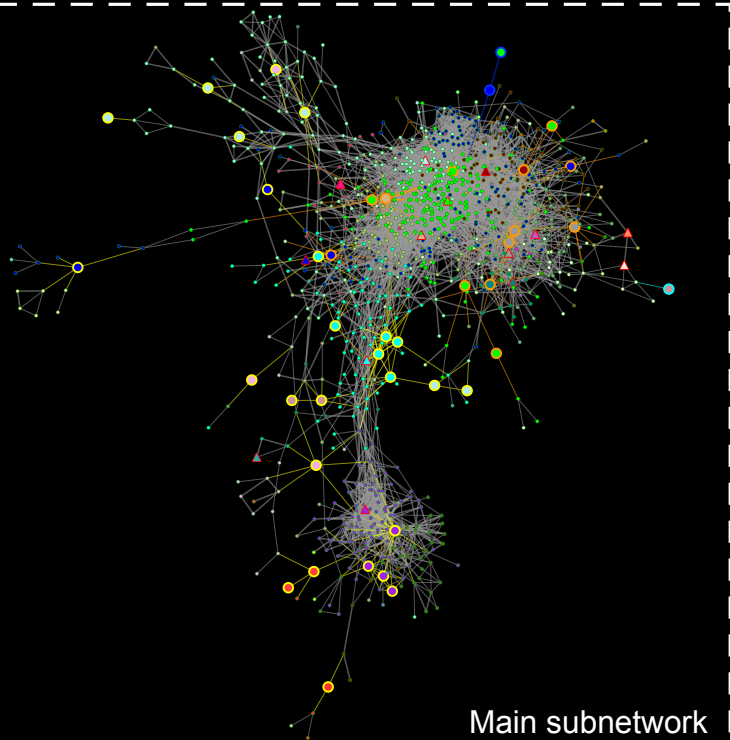

Main subnetwork

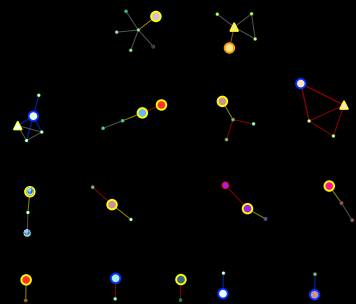

### Young subnetworks

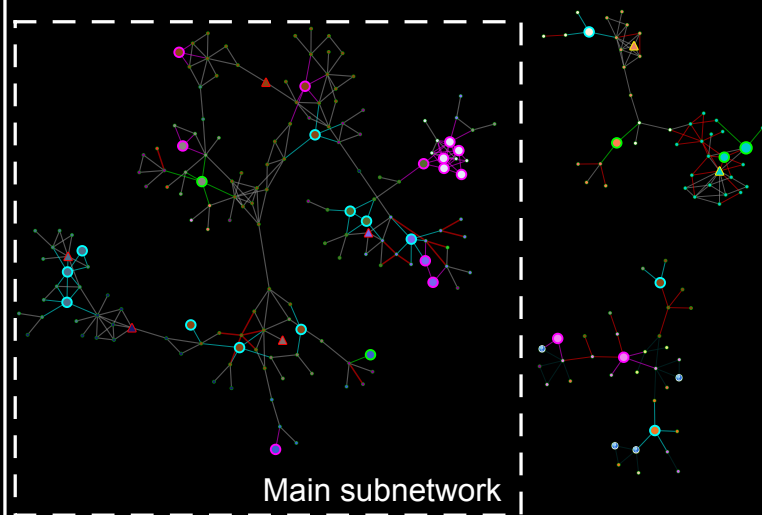

Main subnetwork

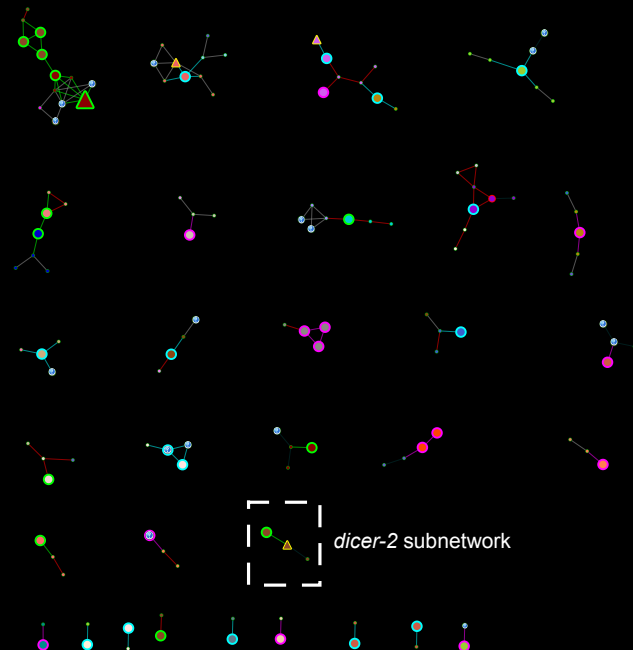

*dicer-2* subnetwork

**Figure S5: Young and old transcript subnetworks corresponding to the second level neighborhood of Iso-MaSigPro DETs.**

Age-related DETs were located in the WGCNA co-expression network and these DETs and their one- and two-step neighbors (*i.e.*, the ‘second level neighborhood’) were then extracted from the co-expression network to provide the shown networks.

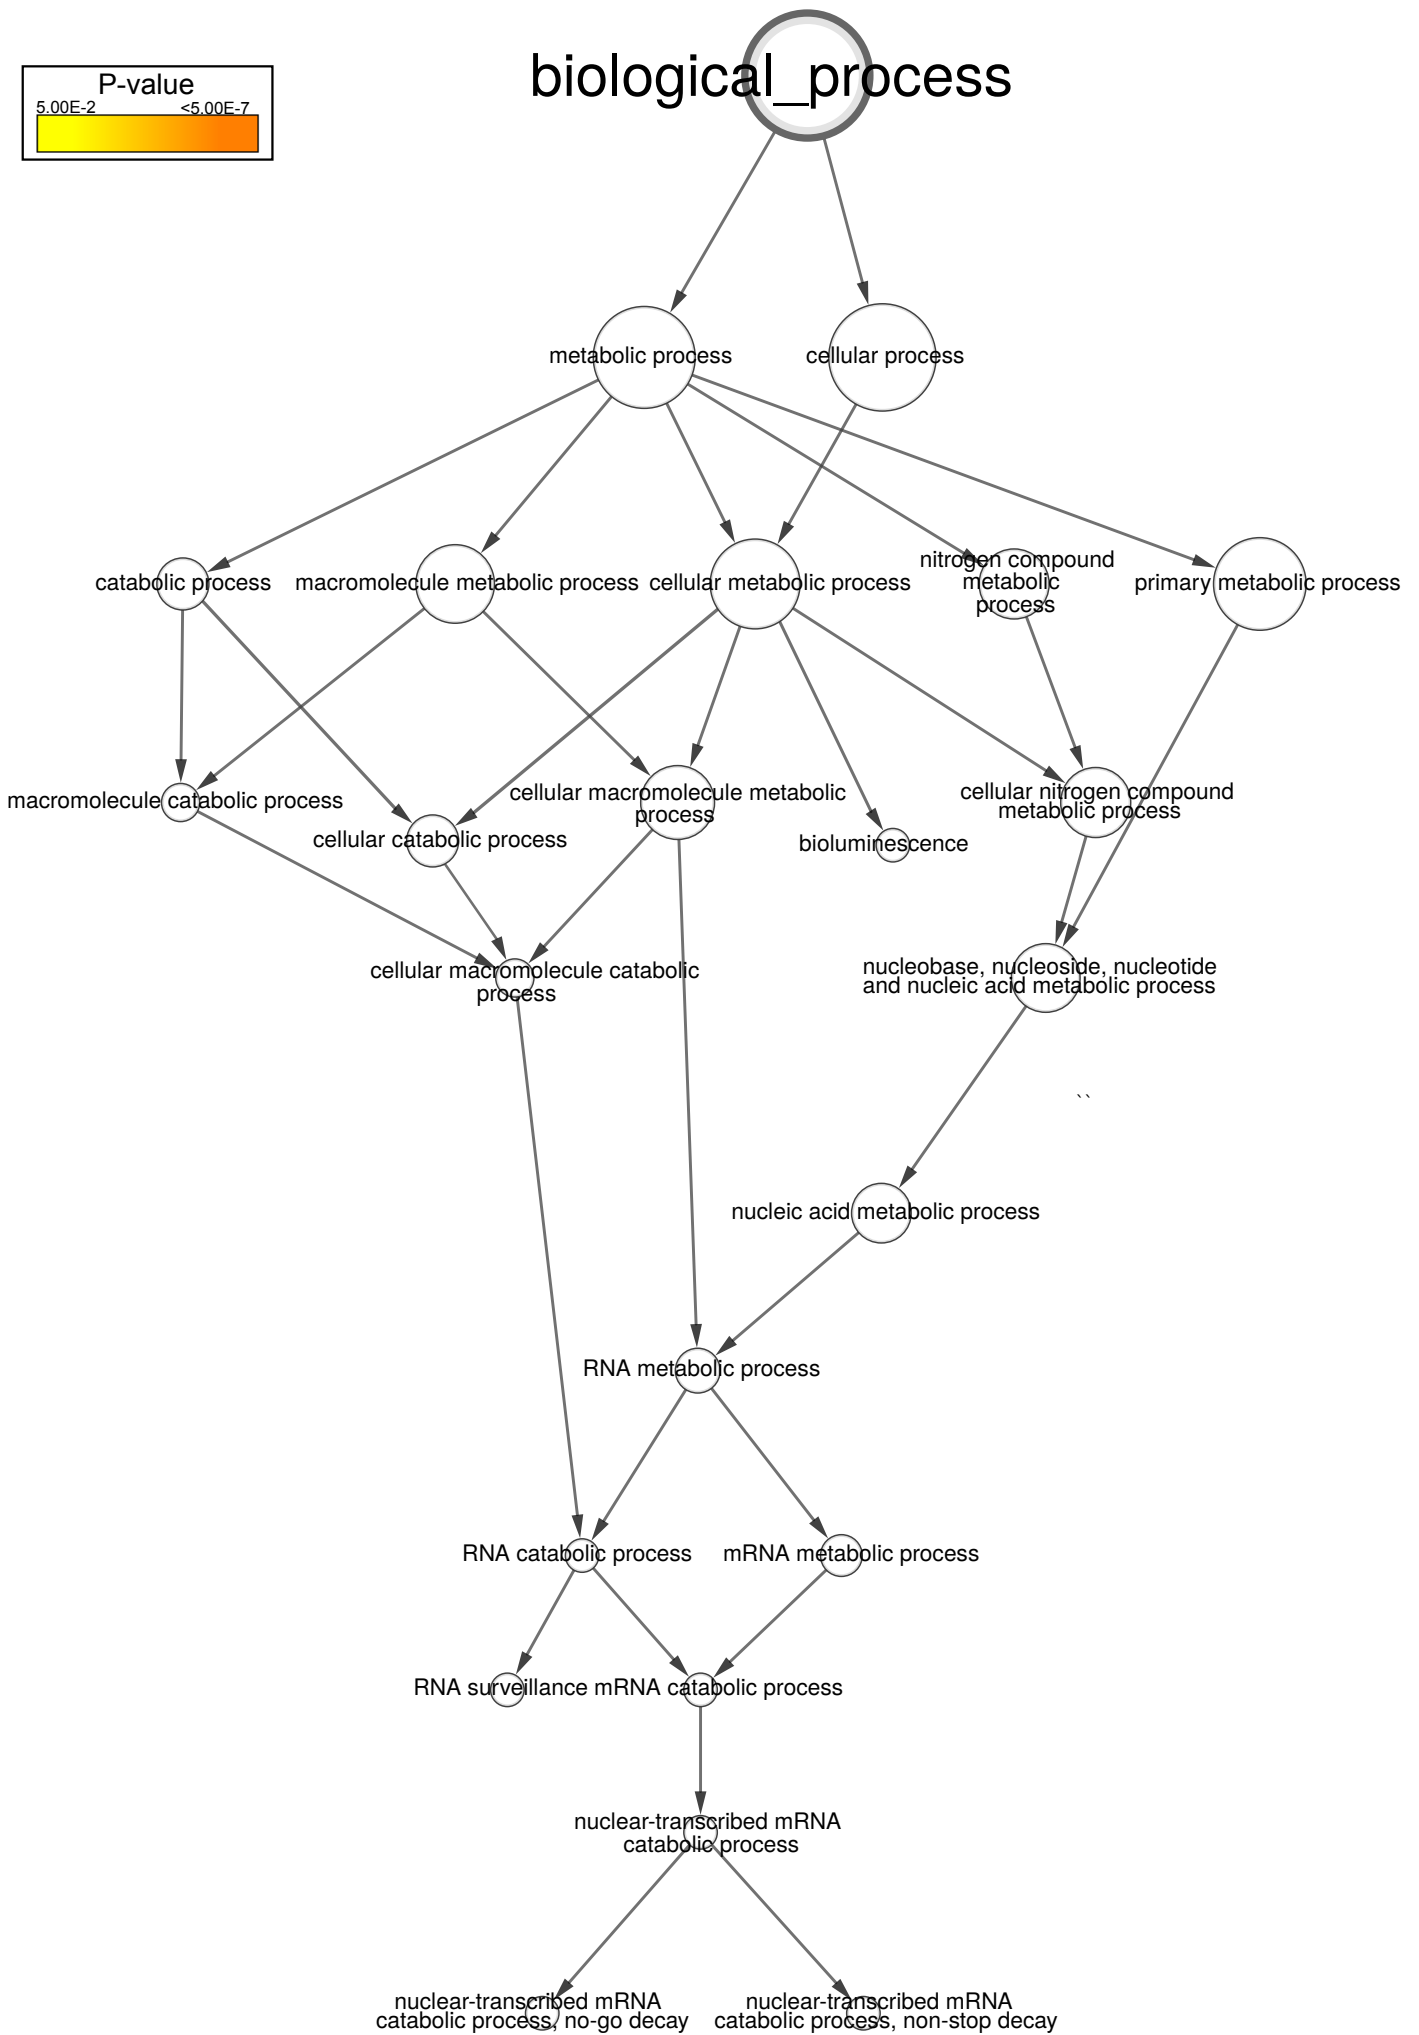

**Figure S6: BiNGO GO enrichment (Biological Process) for the young subnetwork.**  
 No terms were significantly enriched after correcting for multiple testing (FDR).

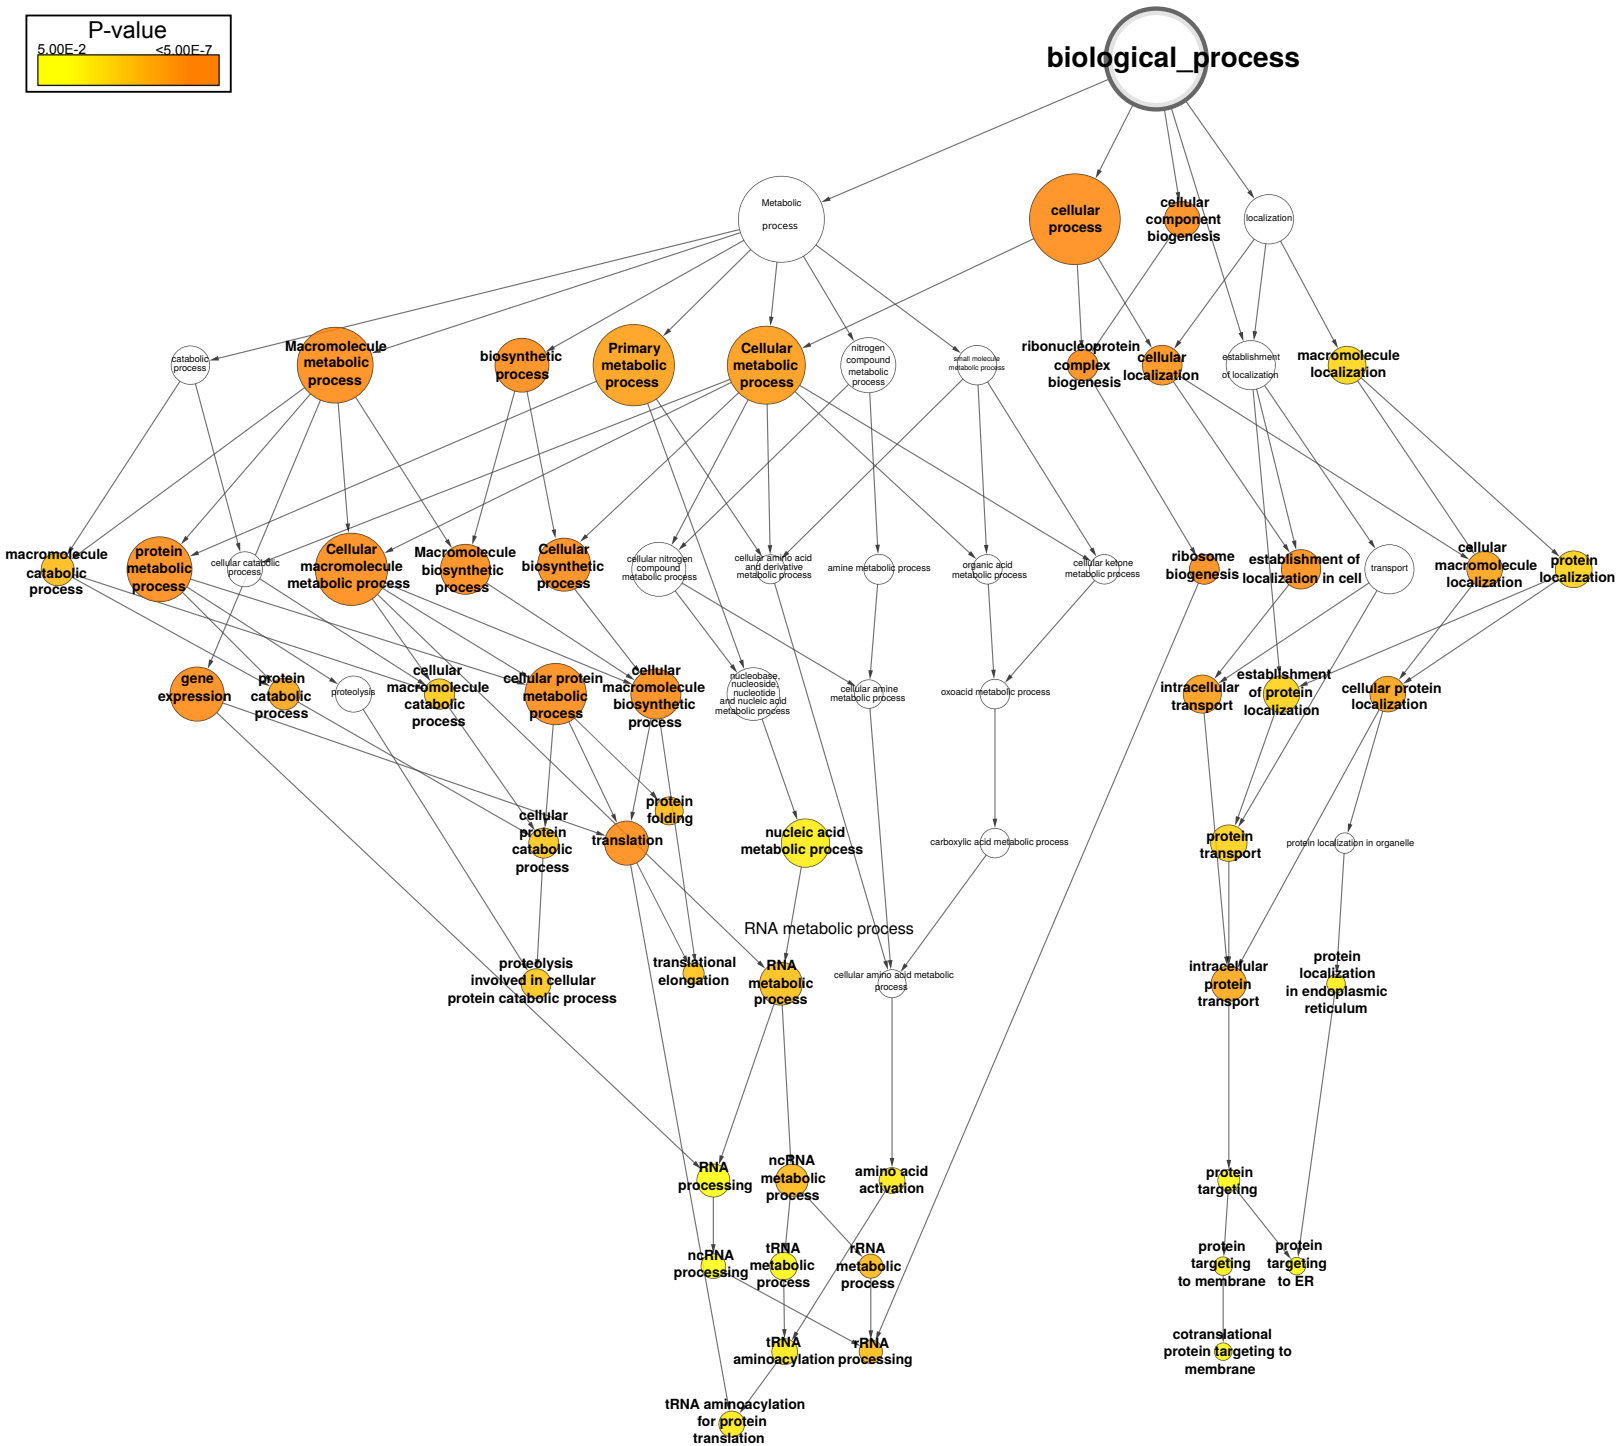

**Figure S7: BiNGO GO enrichment (Biological Process) for the old subnetwork.**

Colored nodes are GO terms that were significantly enriched after correcting for multiple testing (FDR).





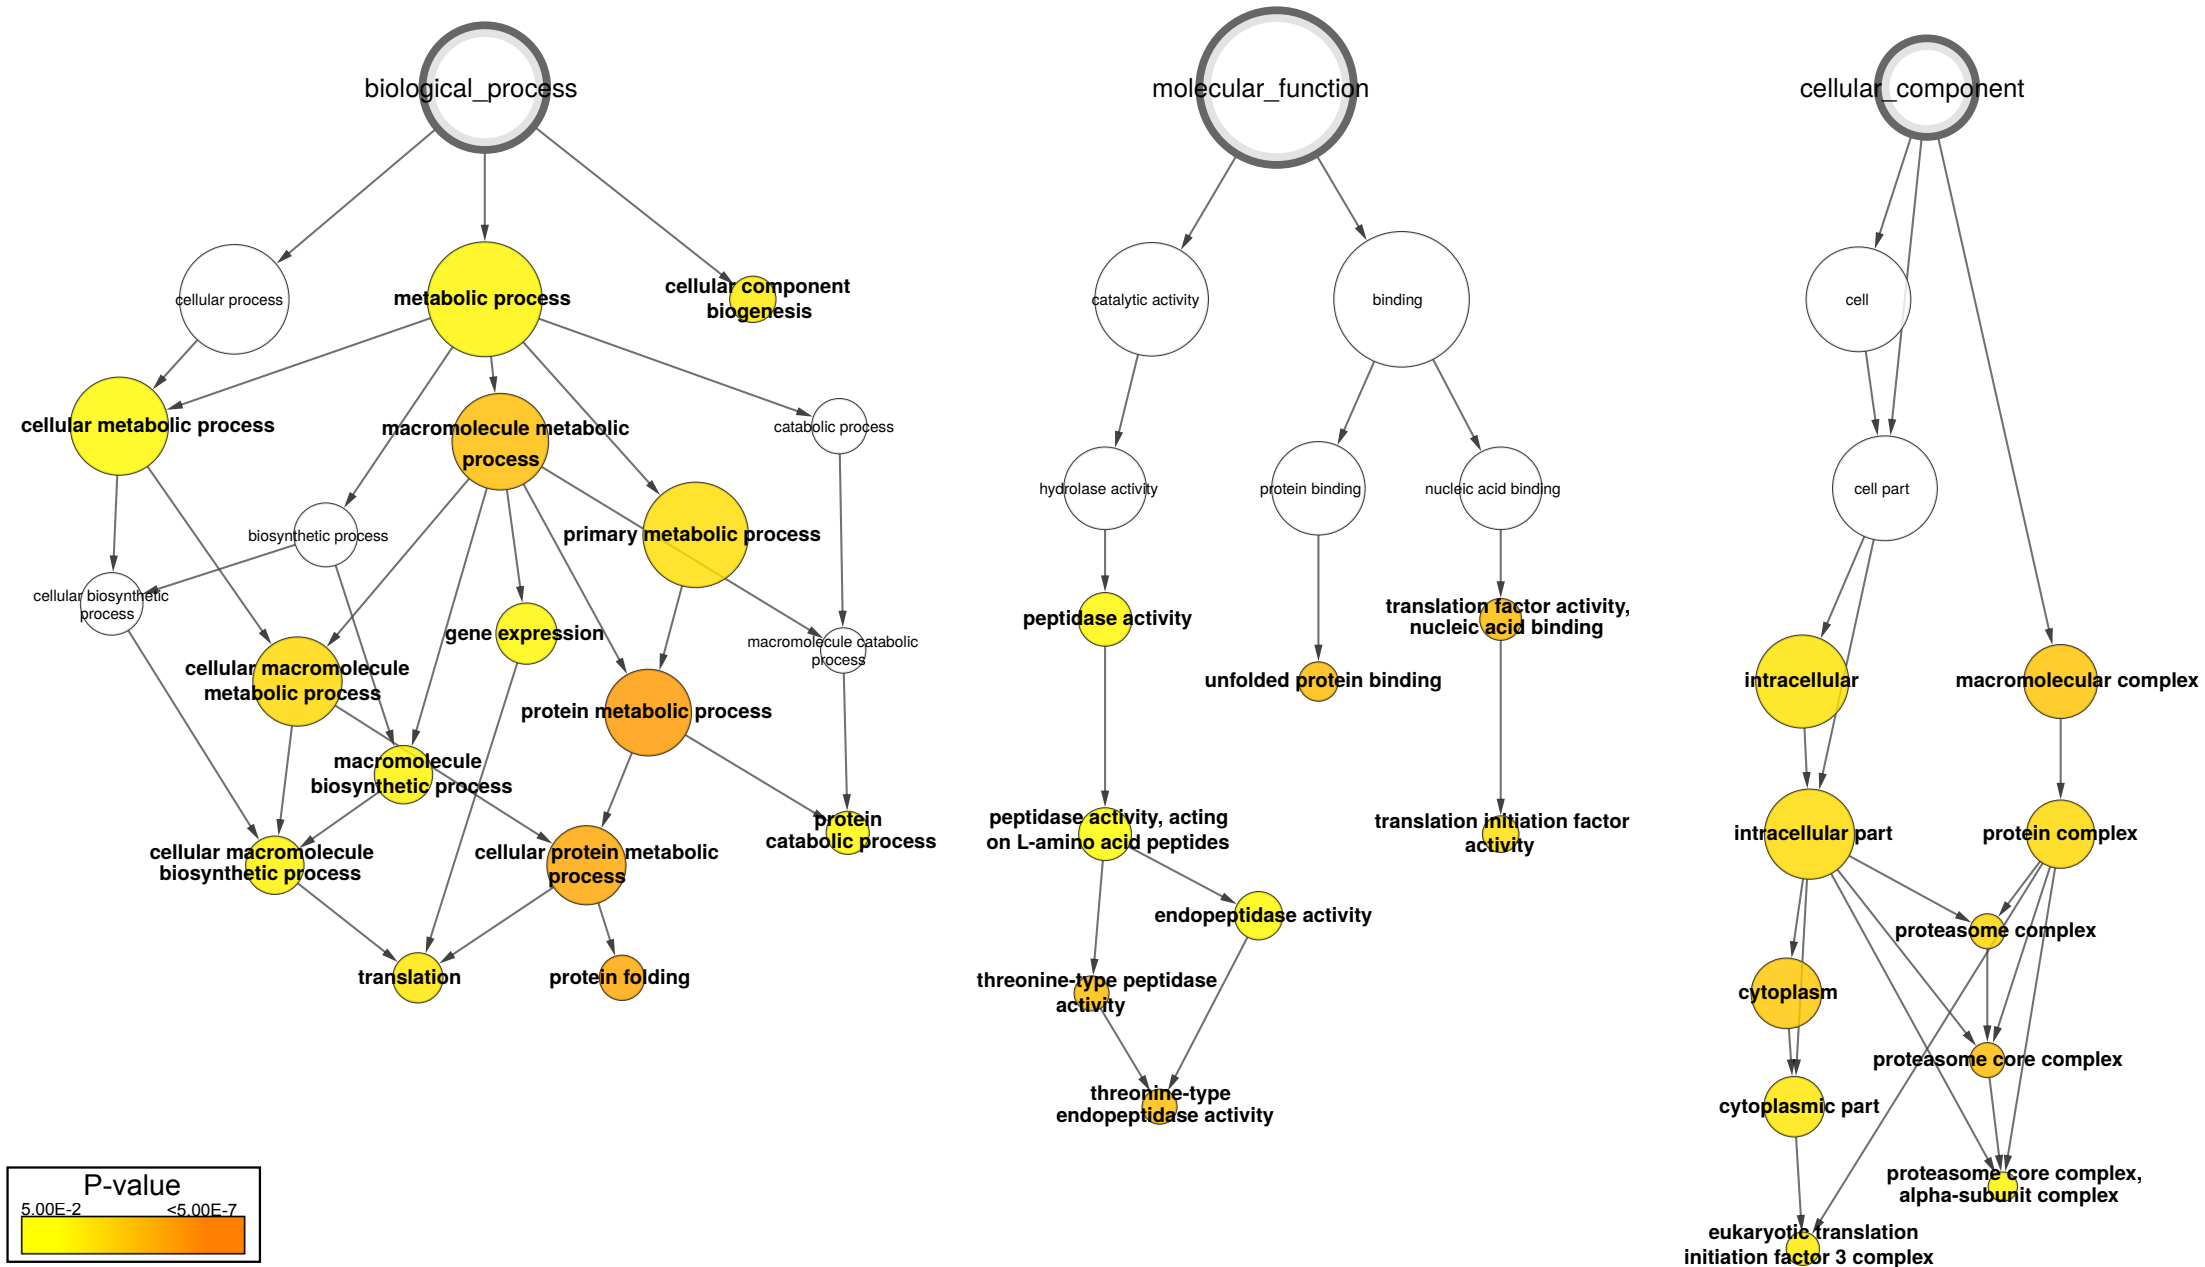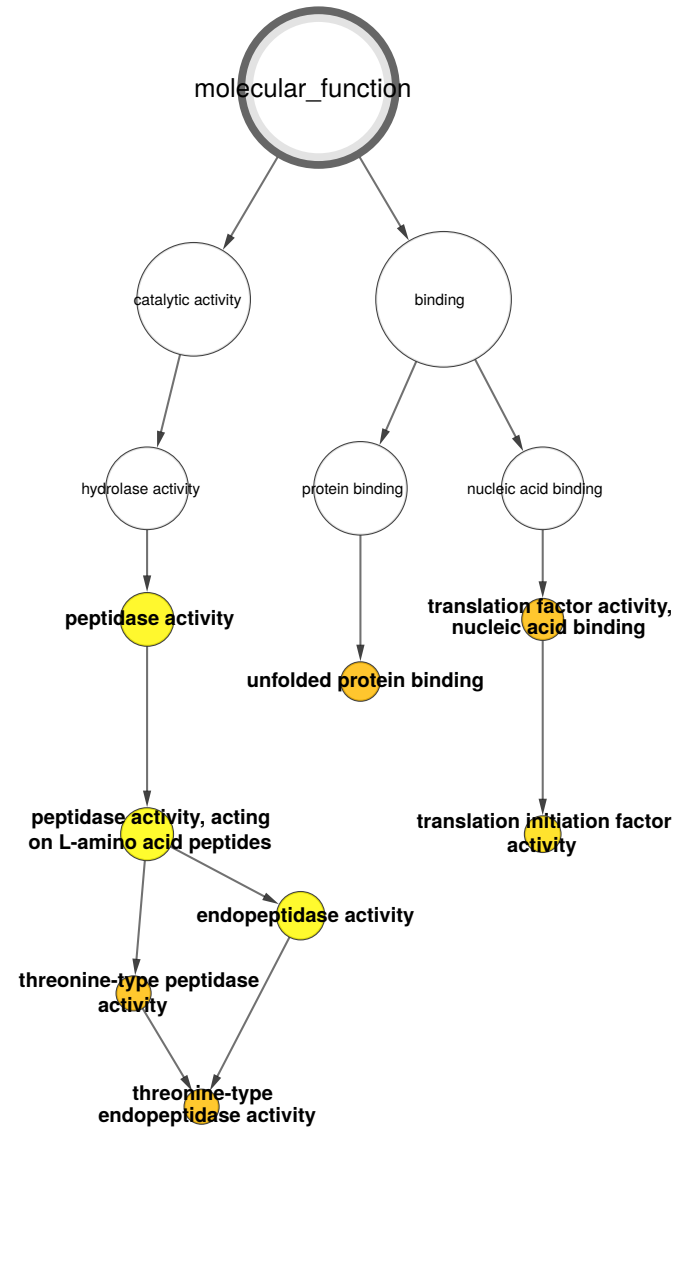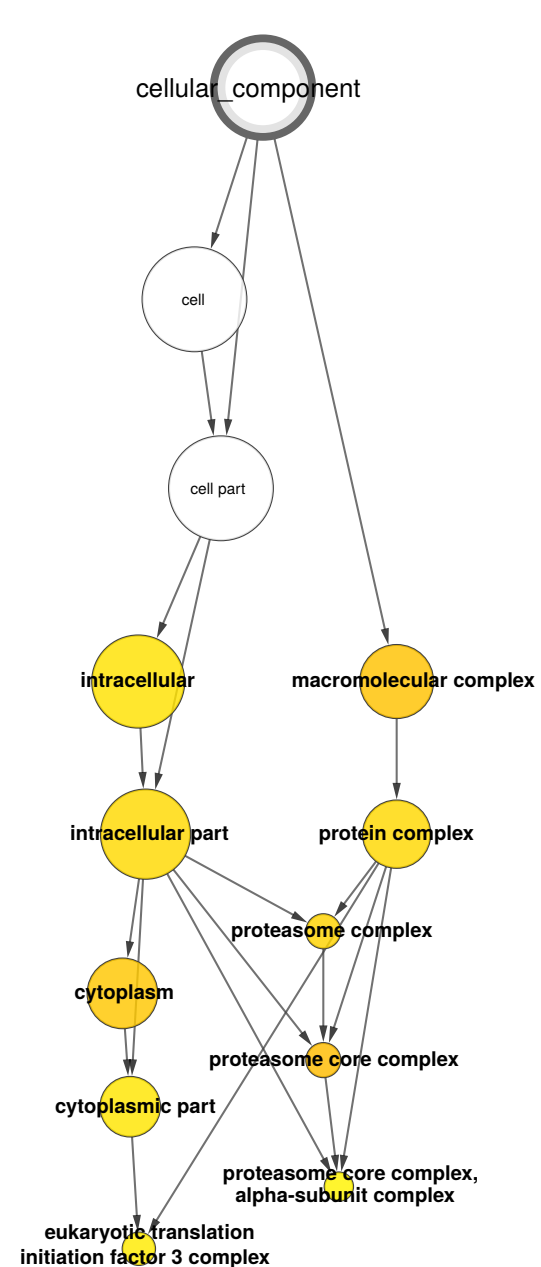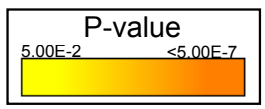

**Figure S9: BiNGO GO enrichment (Biological Process; Molecular Function; Cellular Component) for the 'green' WGCNA module, which is part of the old subnetwork.**  
 Colored nodes are GO terms that were significantly enriched after correcting for multiple testing (FDR).

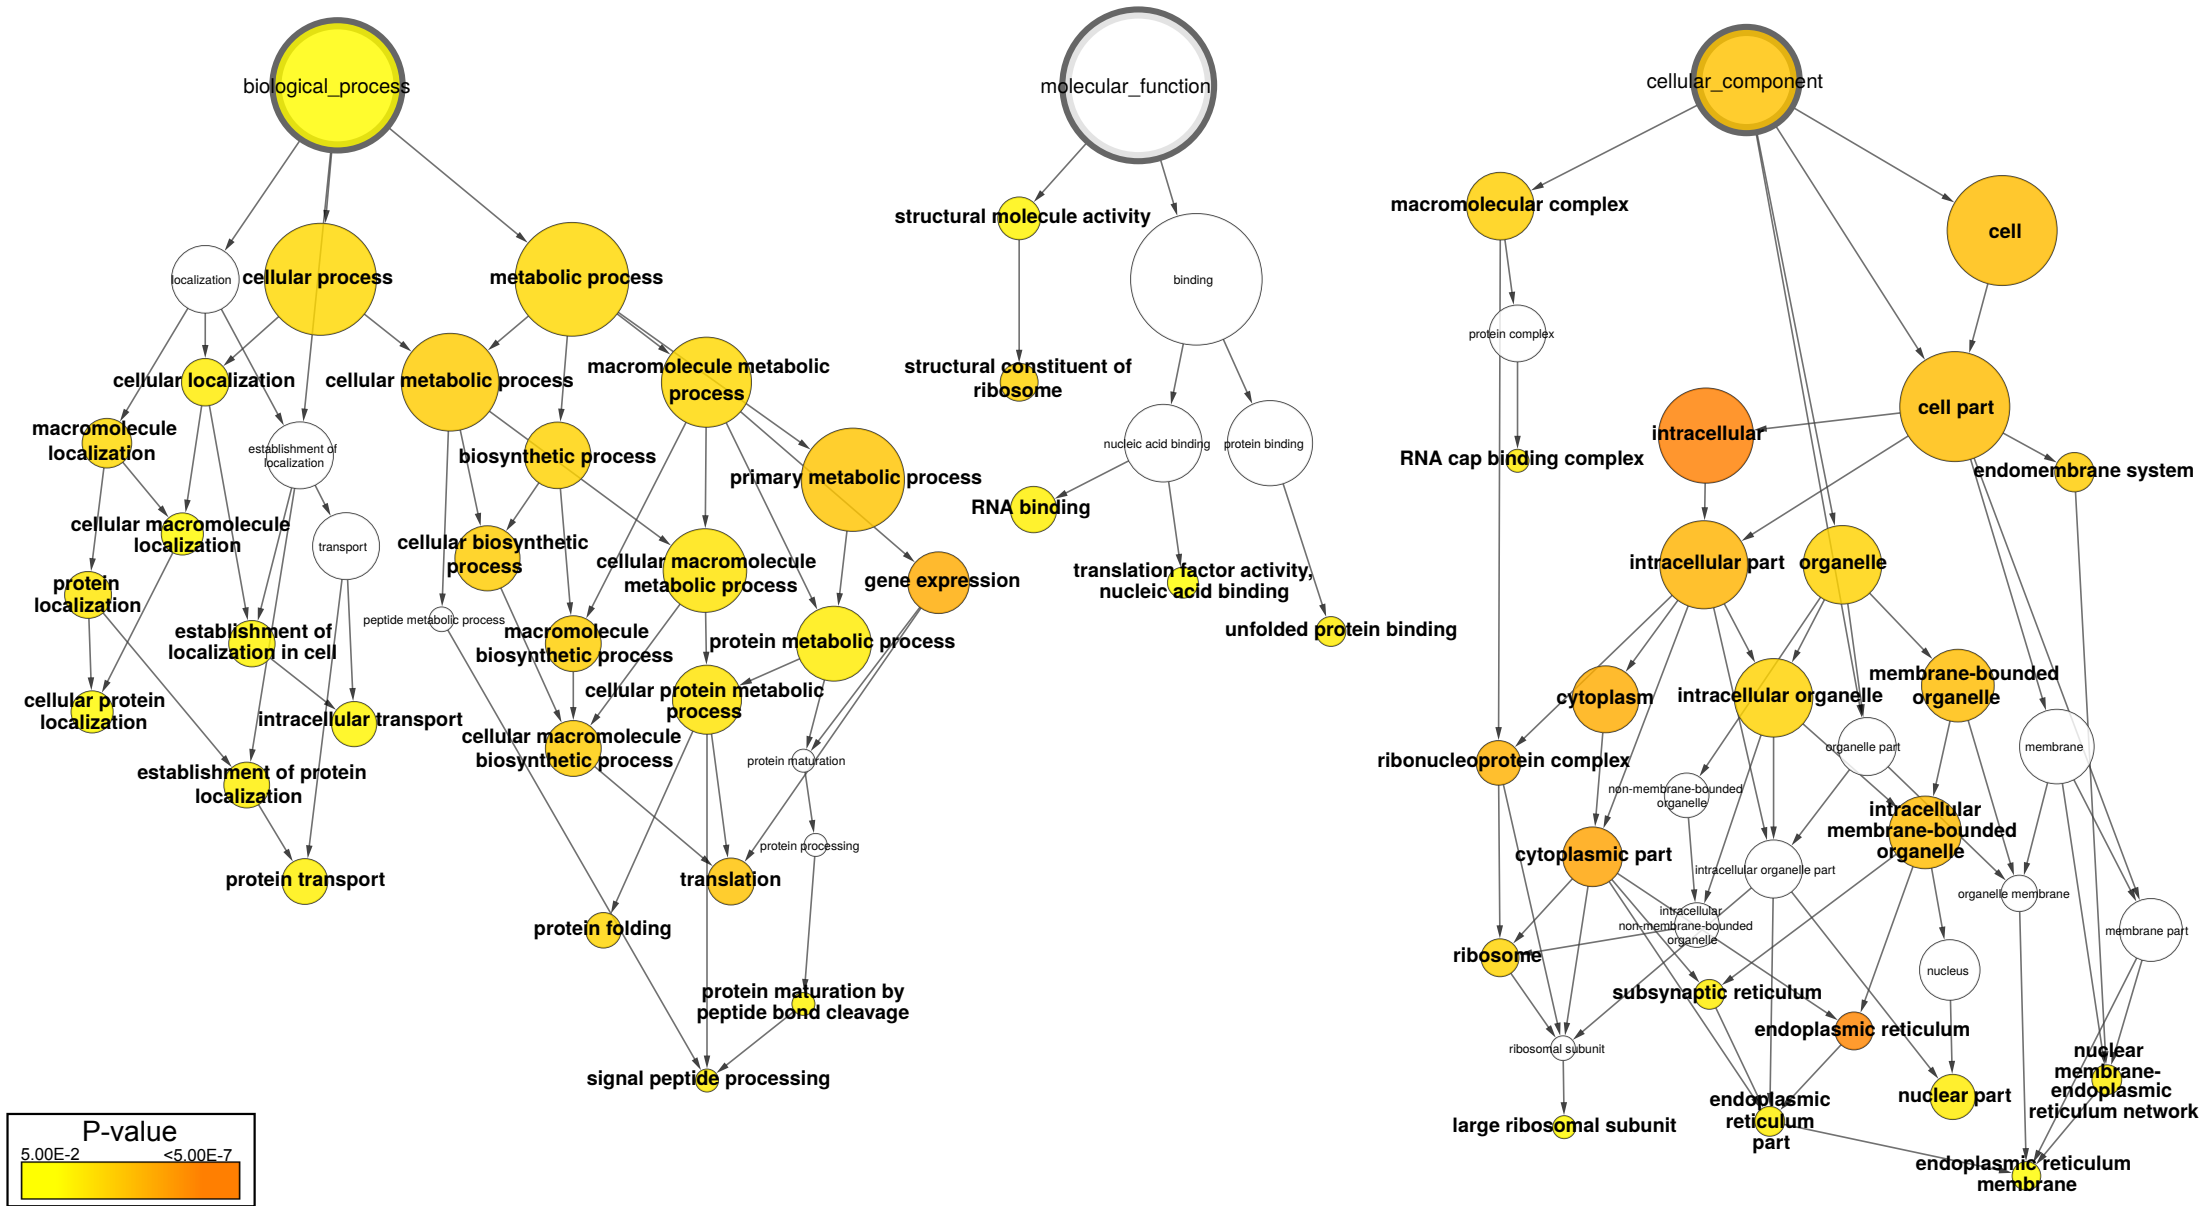

**Figure S10: BiNGO GO enrichment (Biological Process, Molecular Function; Cellular Component) for the 'paleturquoise' WGCNA module, which is part of the old subnetwork.**

Nodes in color are GO terms significantly enriched after correcting for multiple testing (FDR).
