# Supplementary material for: Disentangling the aging gene expression network of termite queens
Source: PubMed Central journal article supplement (PMC8114706; doi:10.1186/s12864-021-07649-4), 2021-05-11

### WGCNA module-age associations.

Listed are the eigengenes and the correlation coefficients for each with respect to age (p-values in parenthesis). Color code of the correlations range from 1 (red), meaning perfect positive correlation, over white (0: no correlation) to -1 (blue), meaning perfect negative correlation.

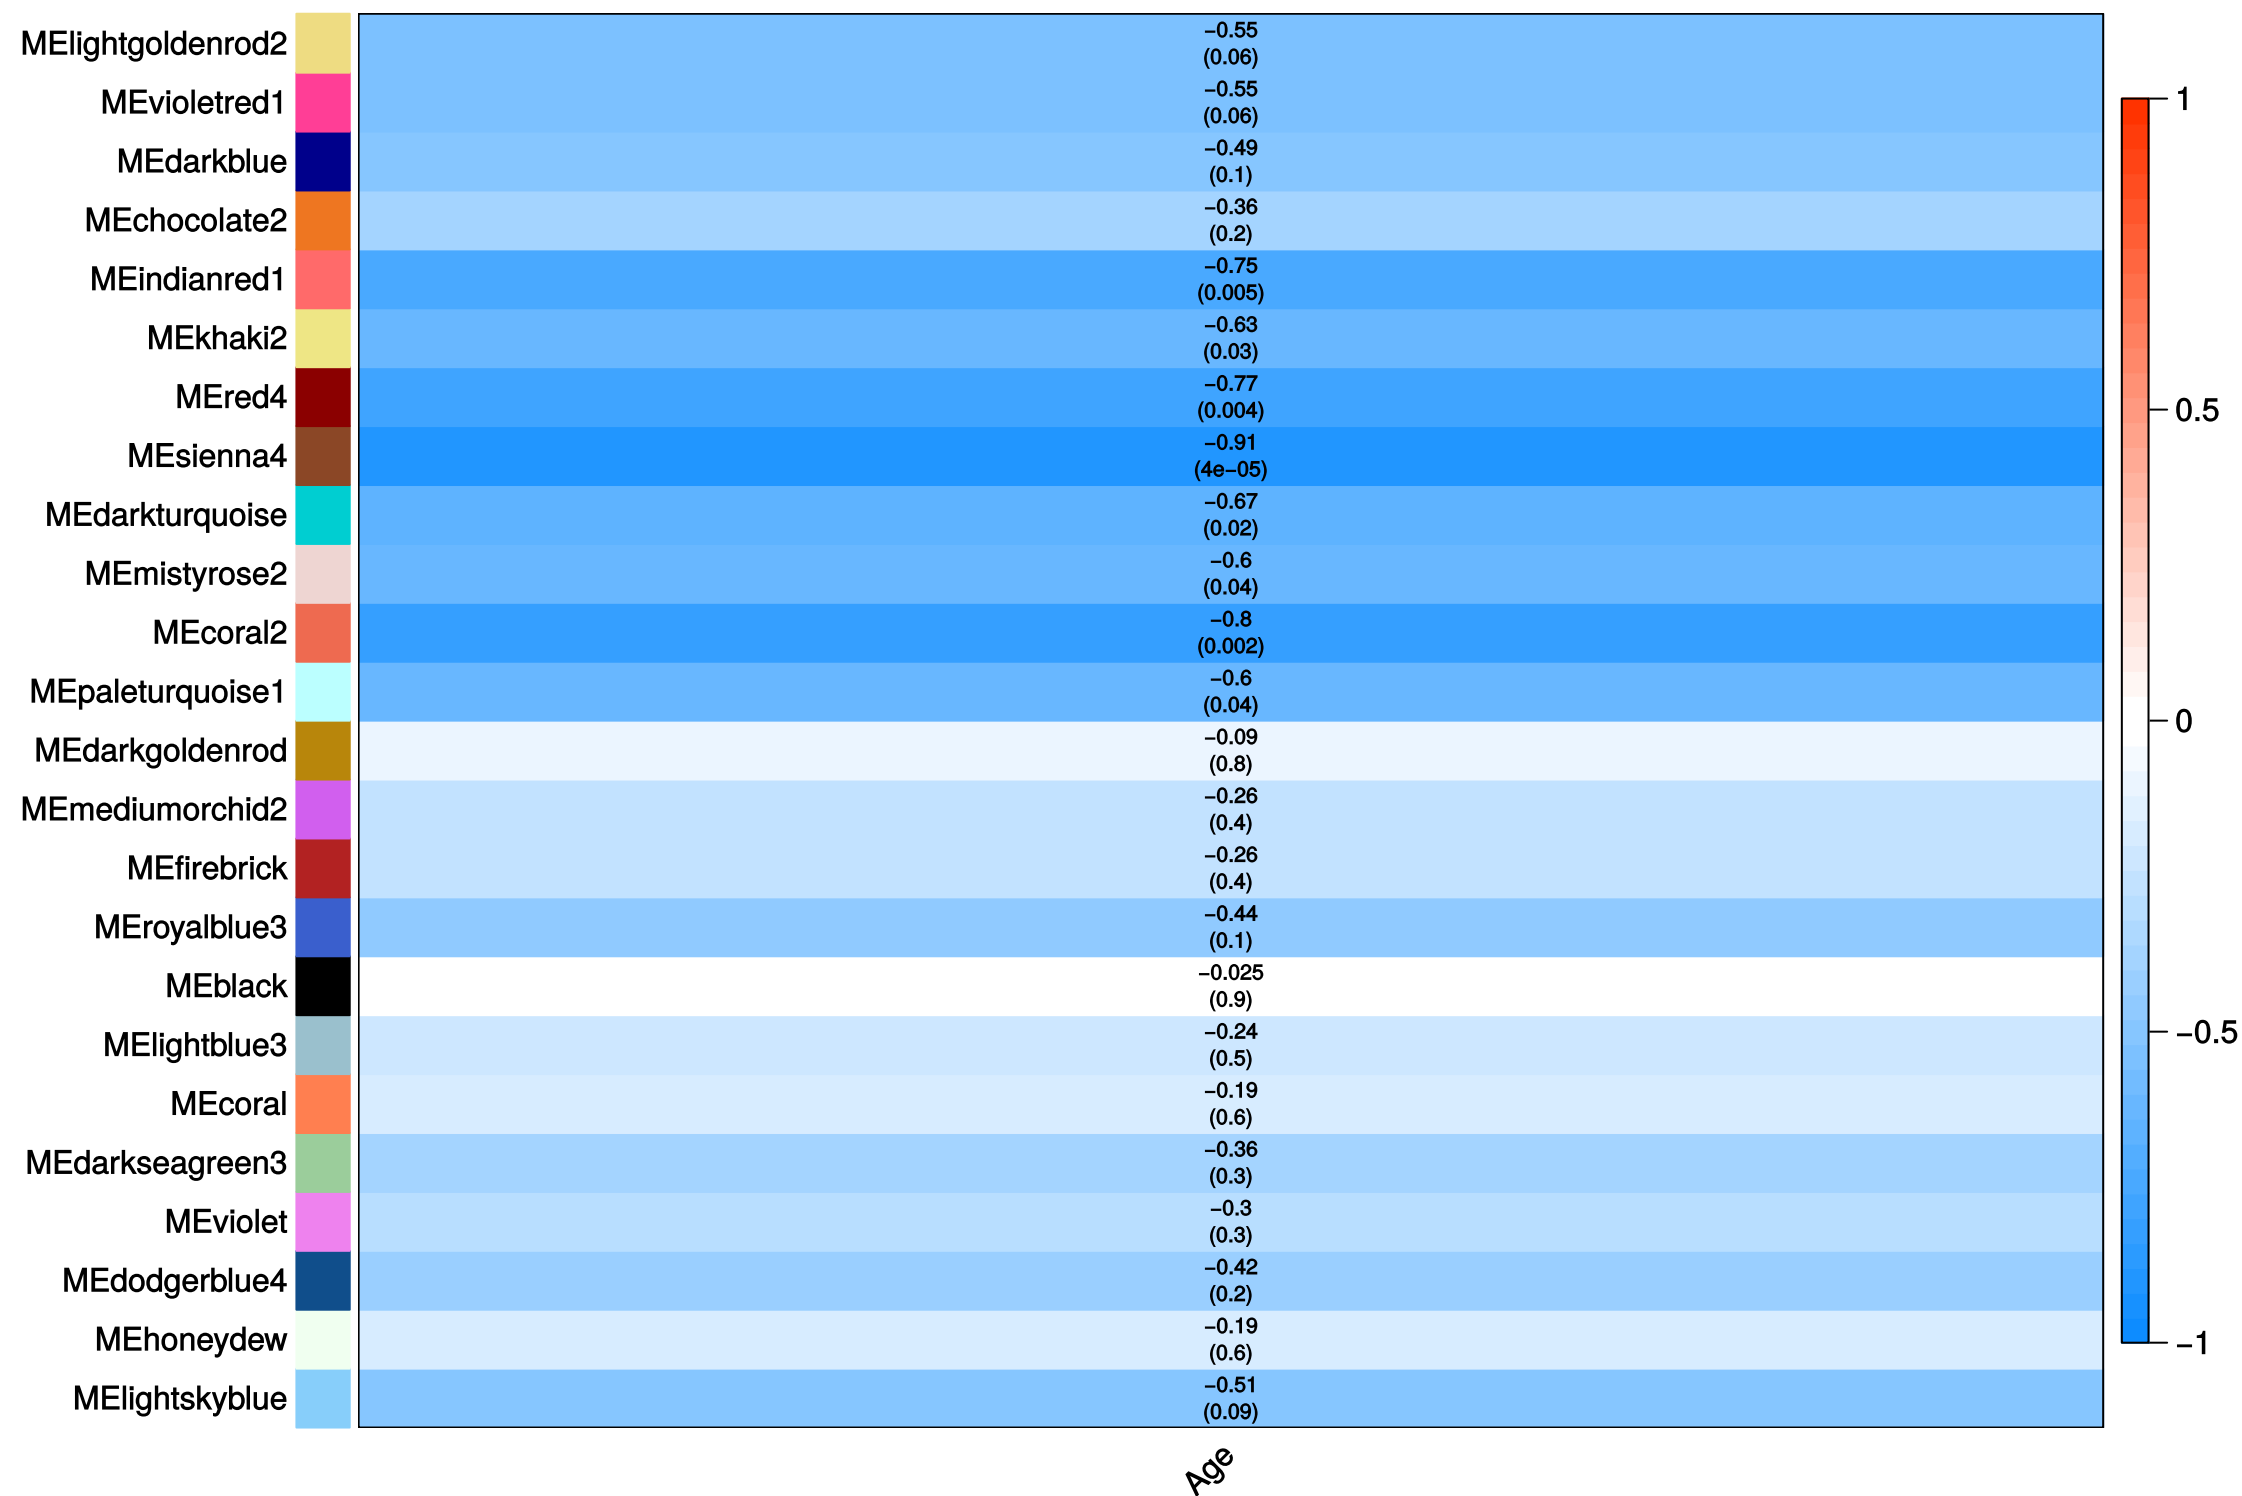

# WGCNA module-age associations - continued.

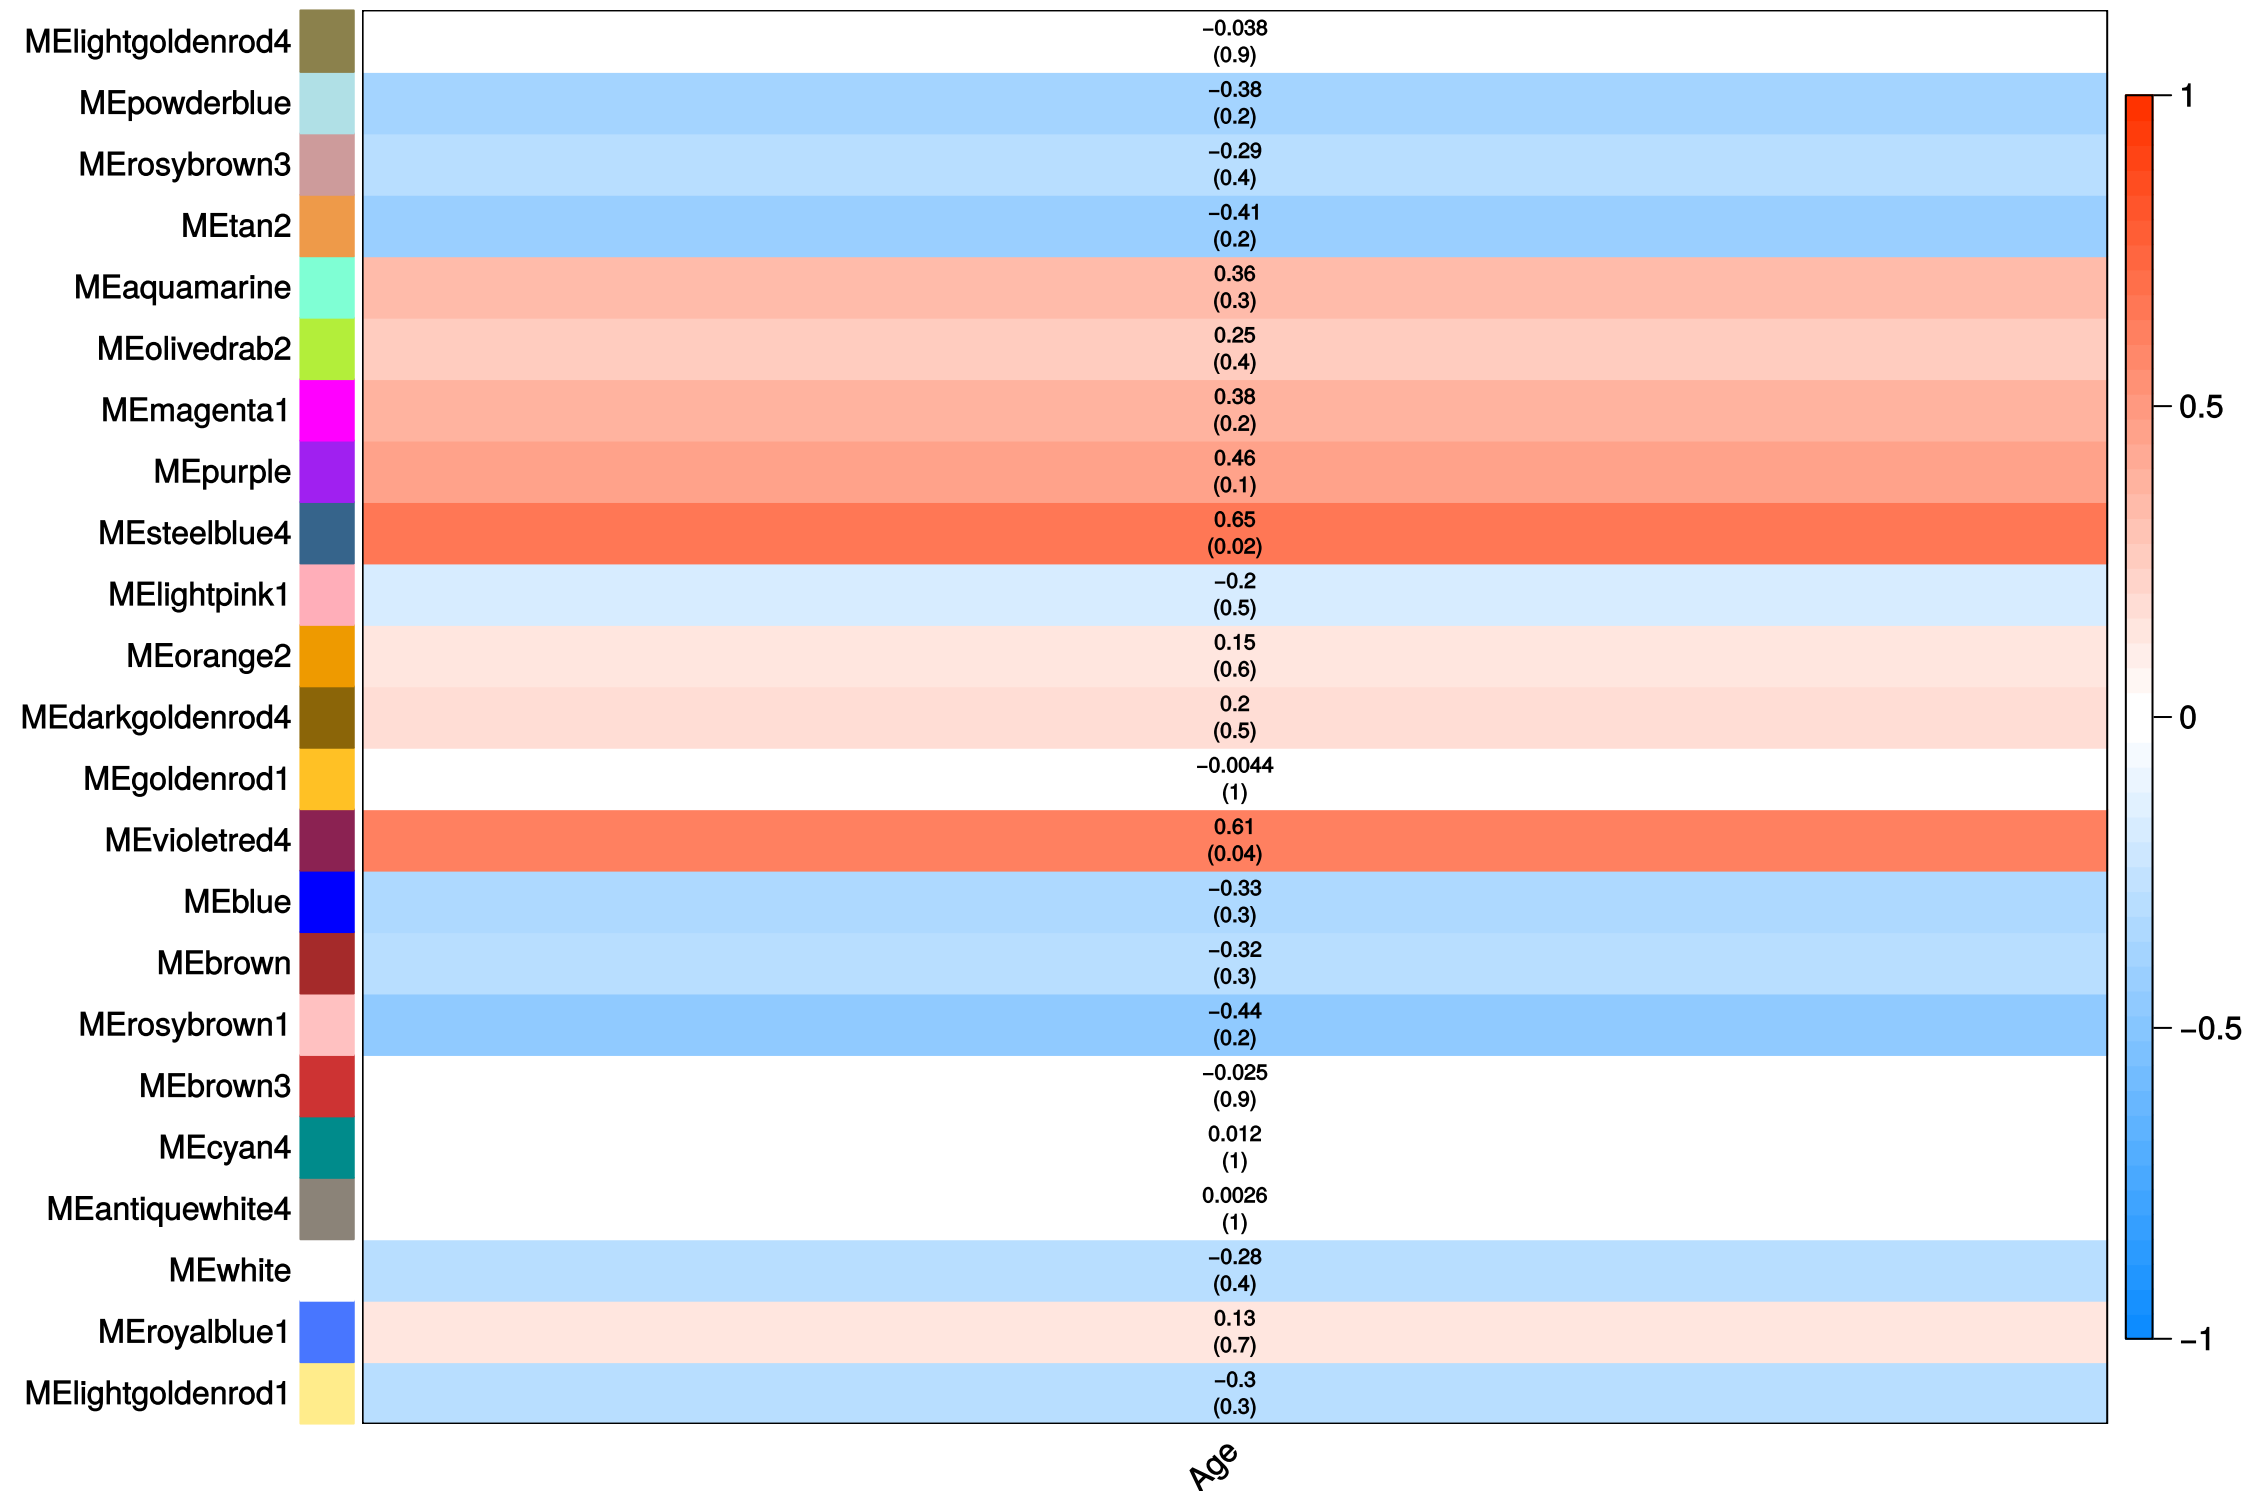

# WGCNA module-age associations - continued.

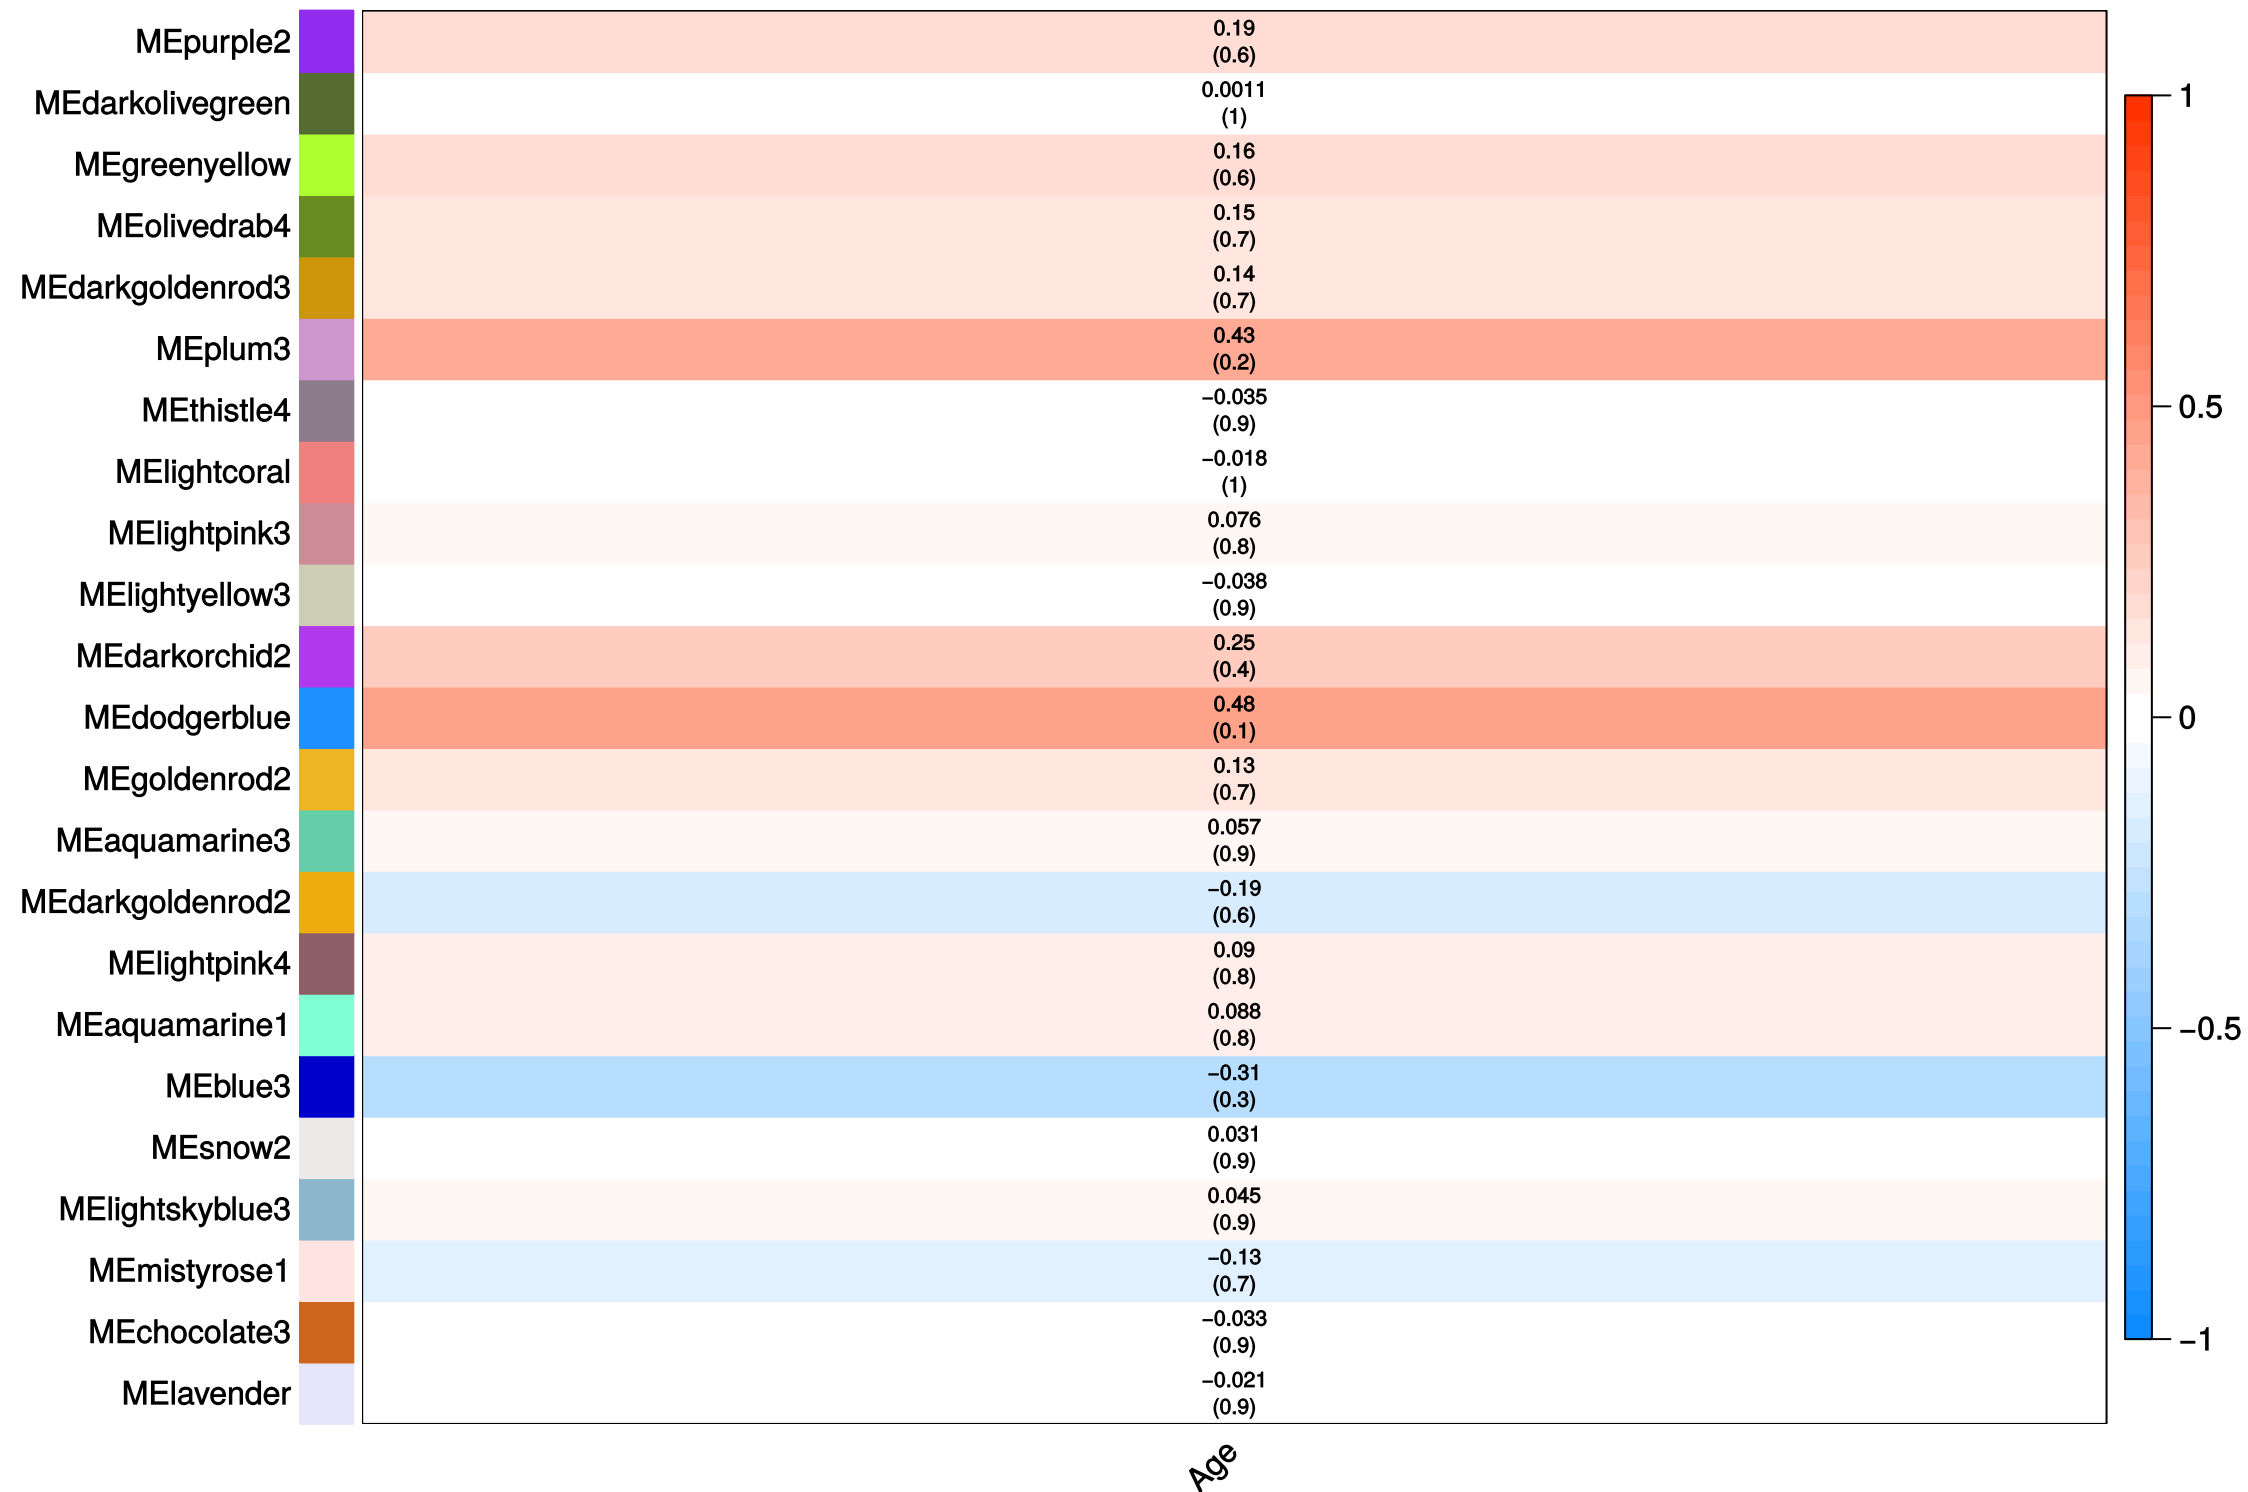

# WGCNA module-age associations - continued.

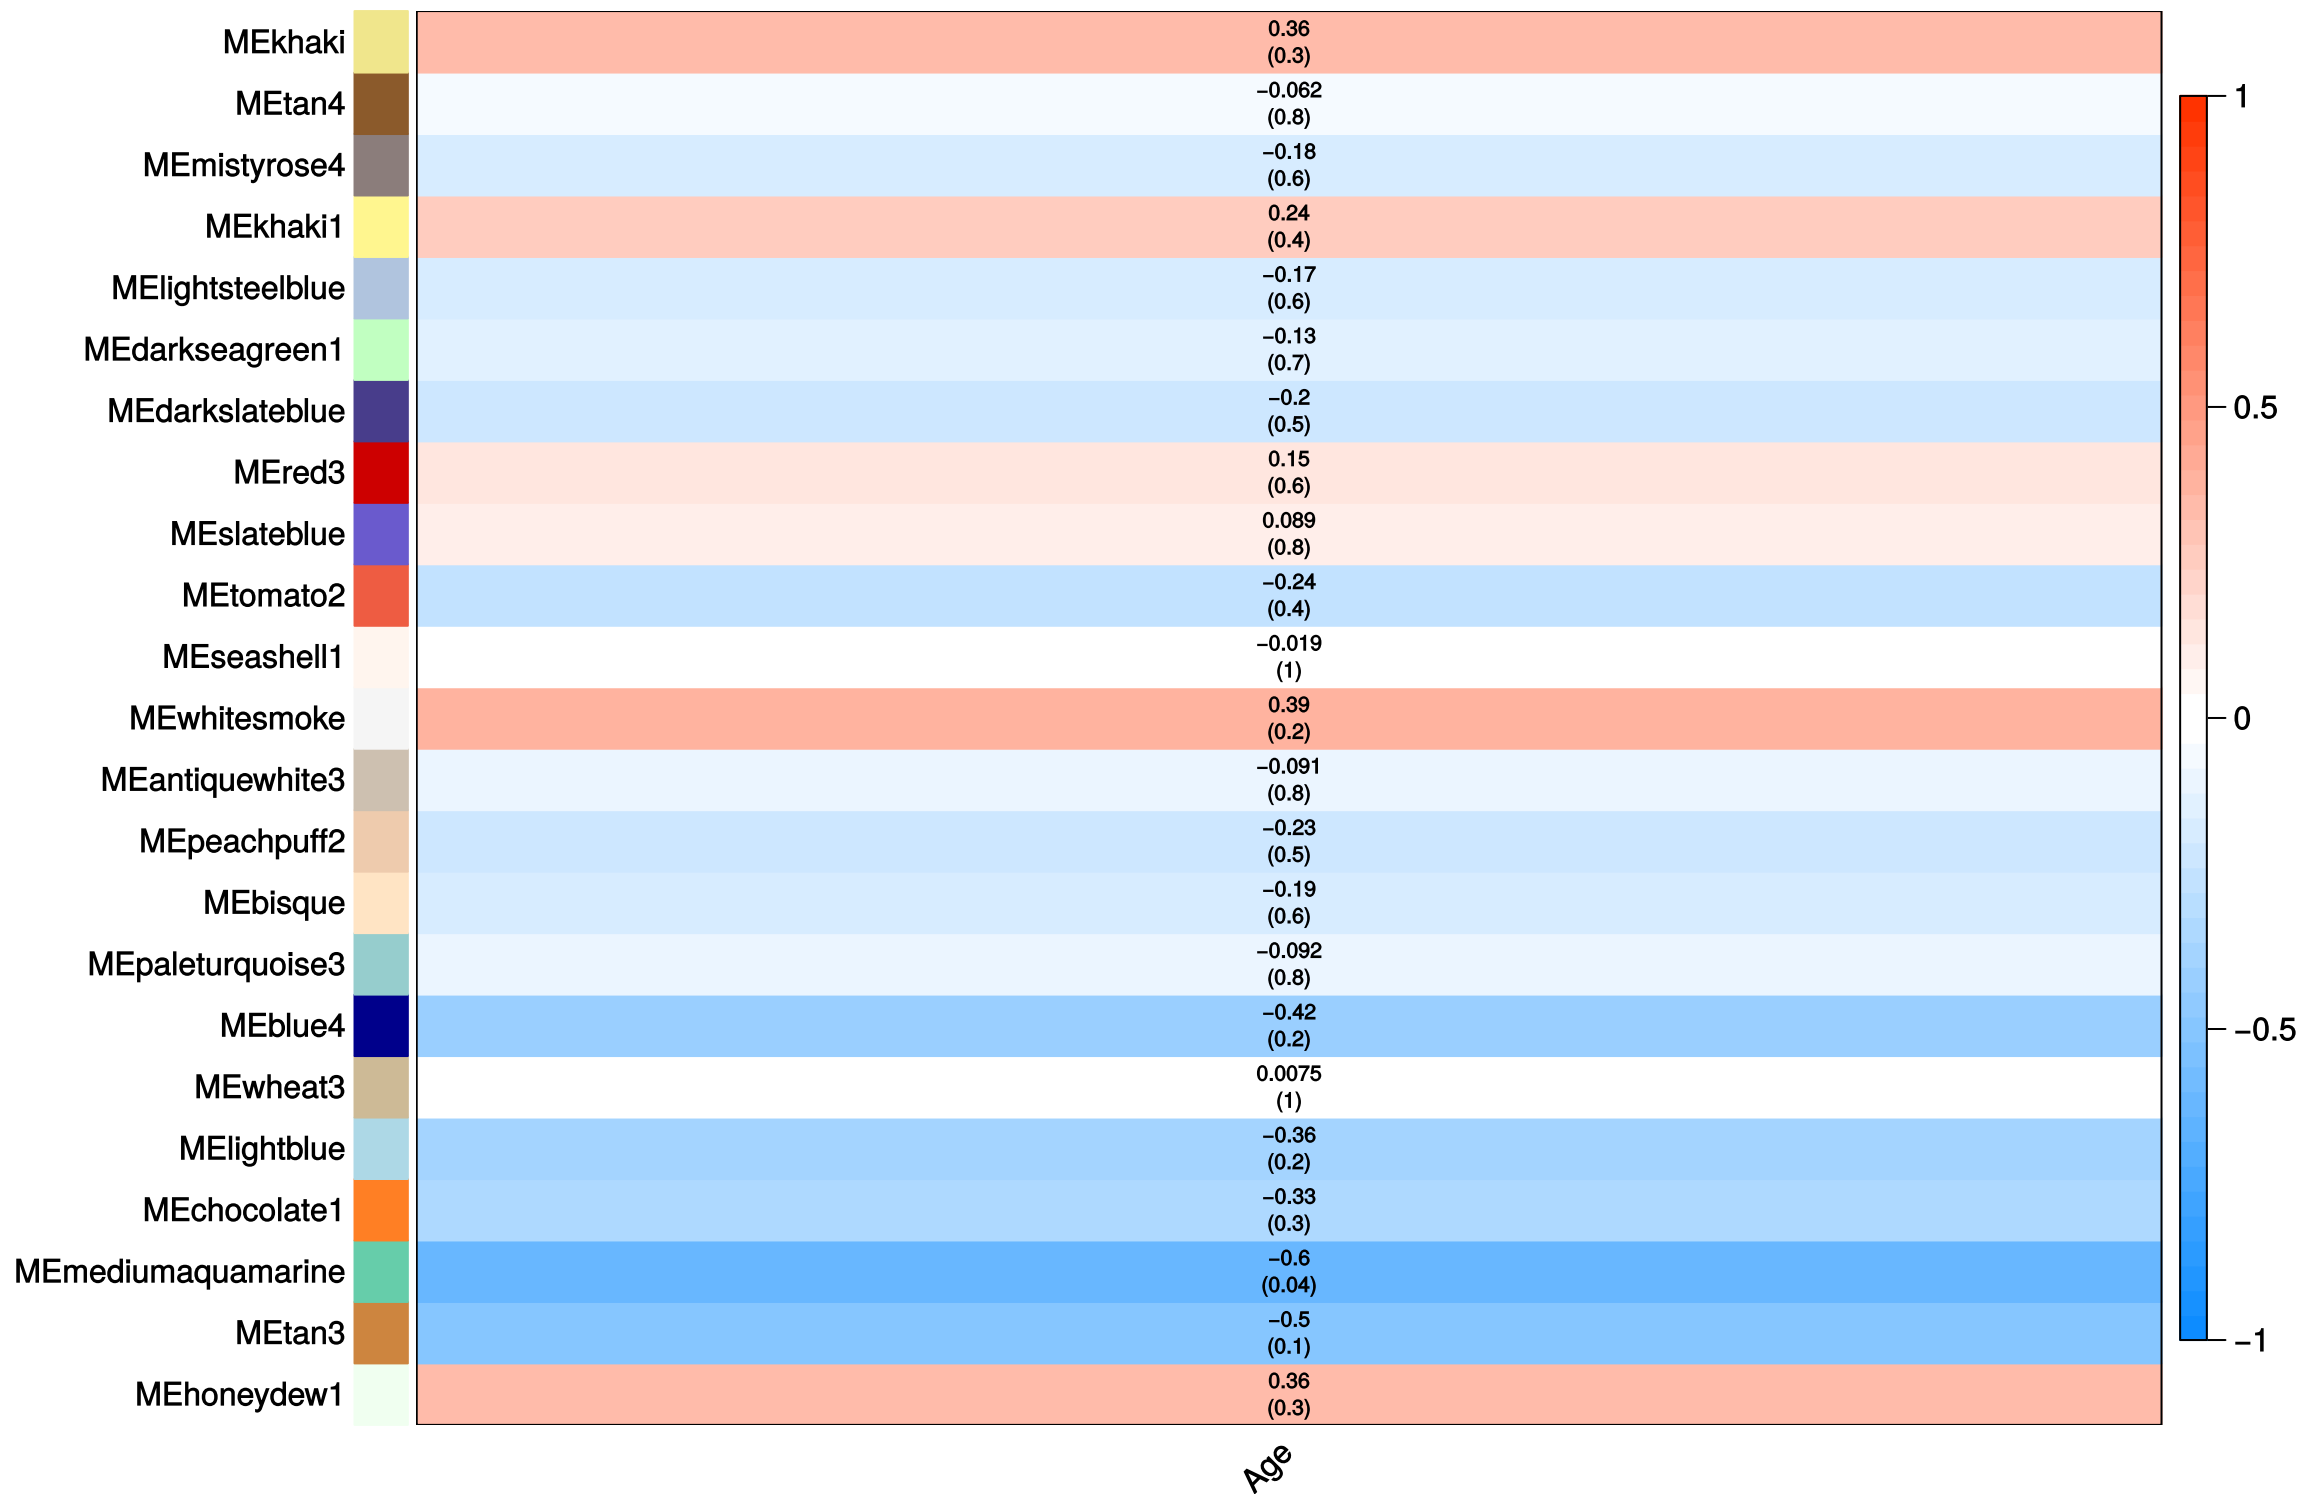

# WGCNA module-age associations - continued.

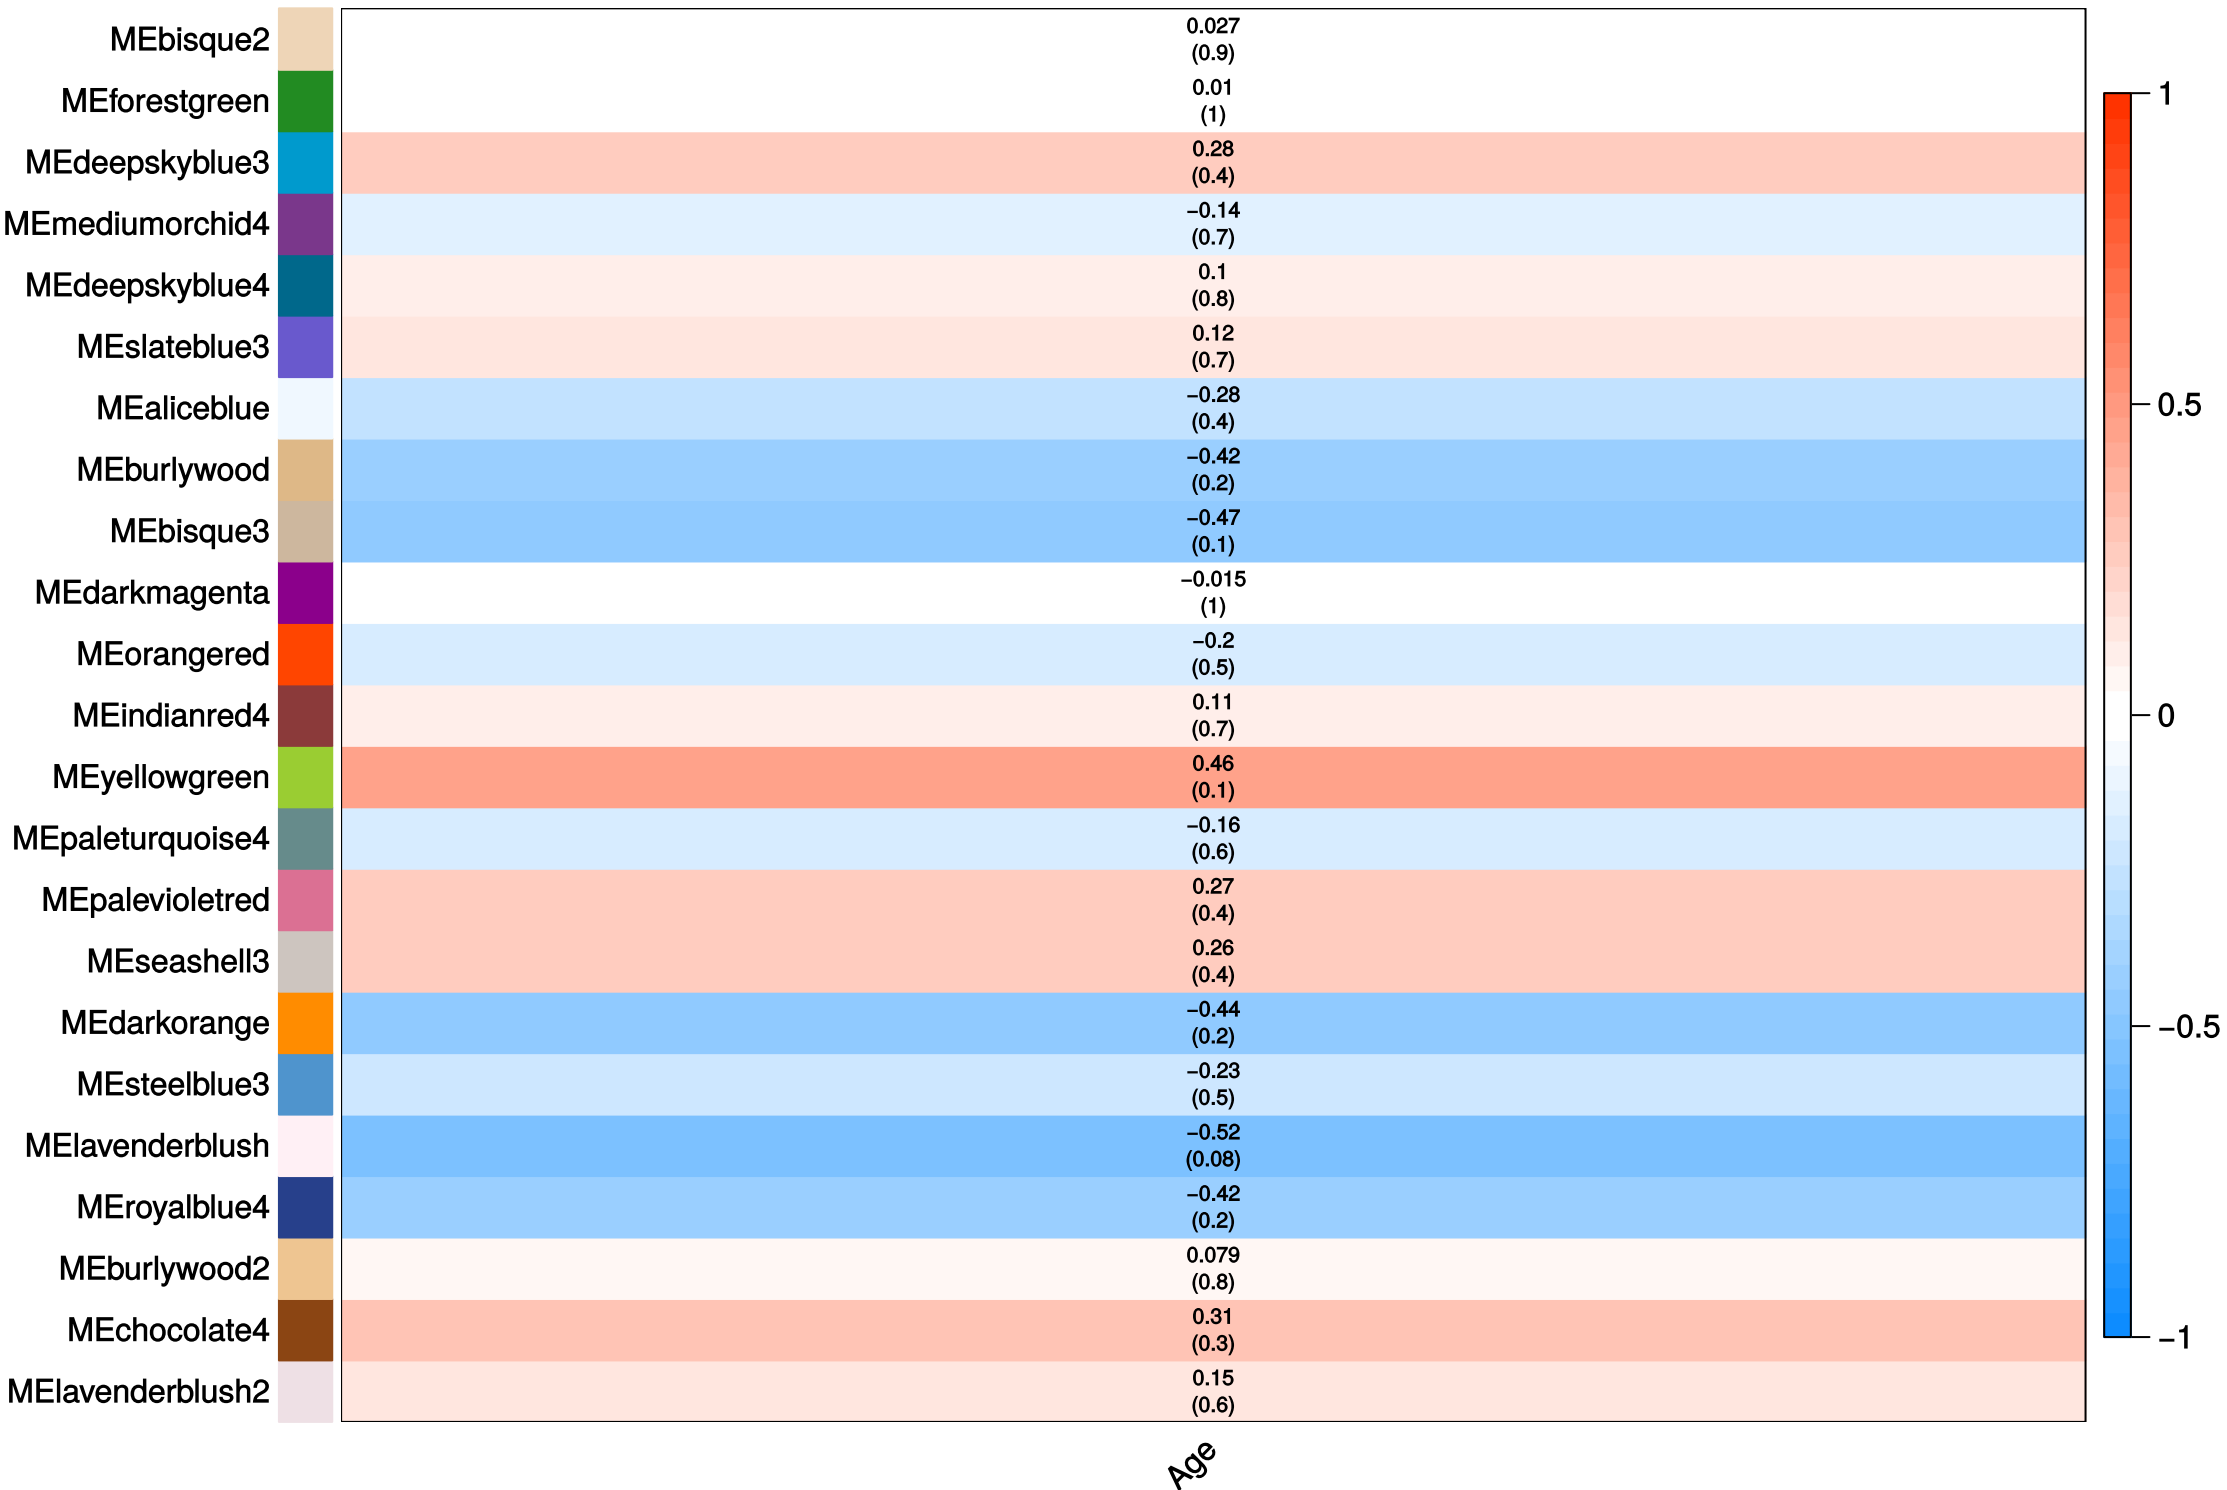

# WGCNA module-age associations - continued.

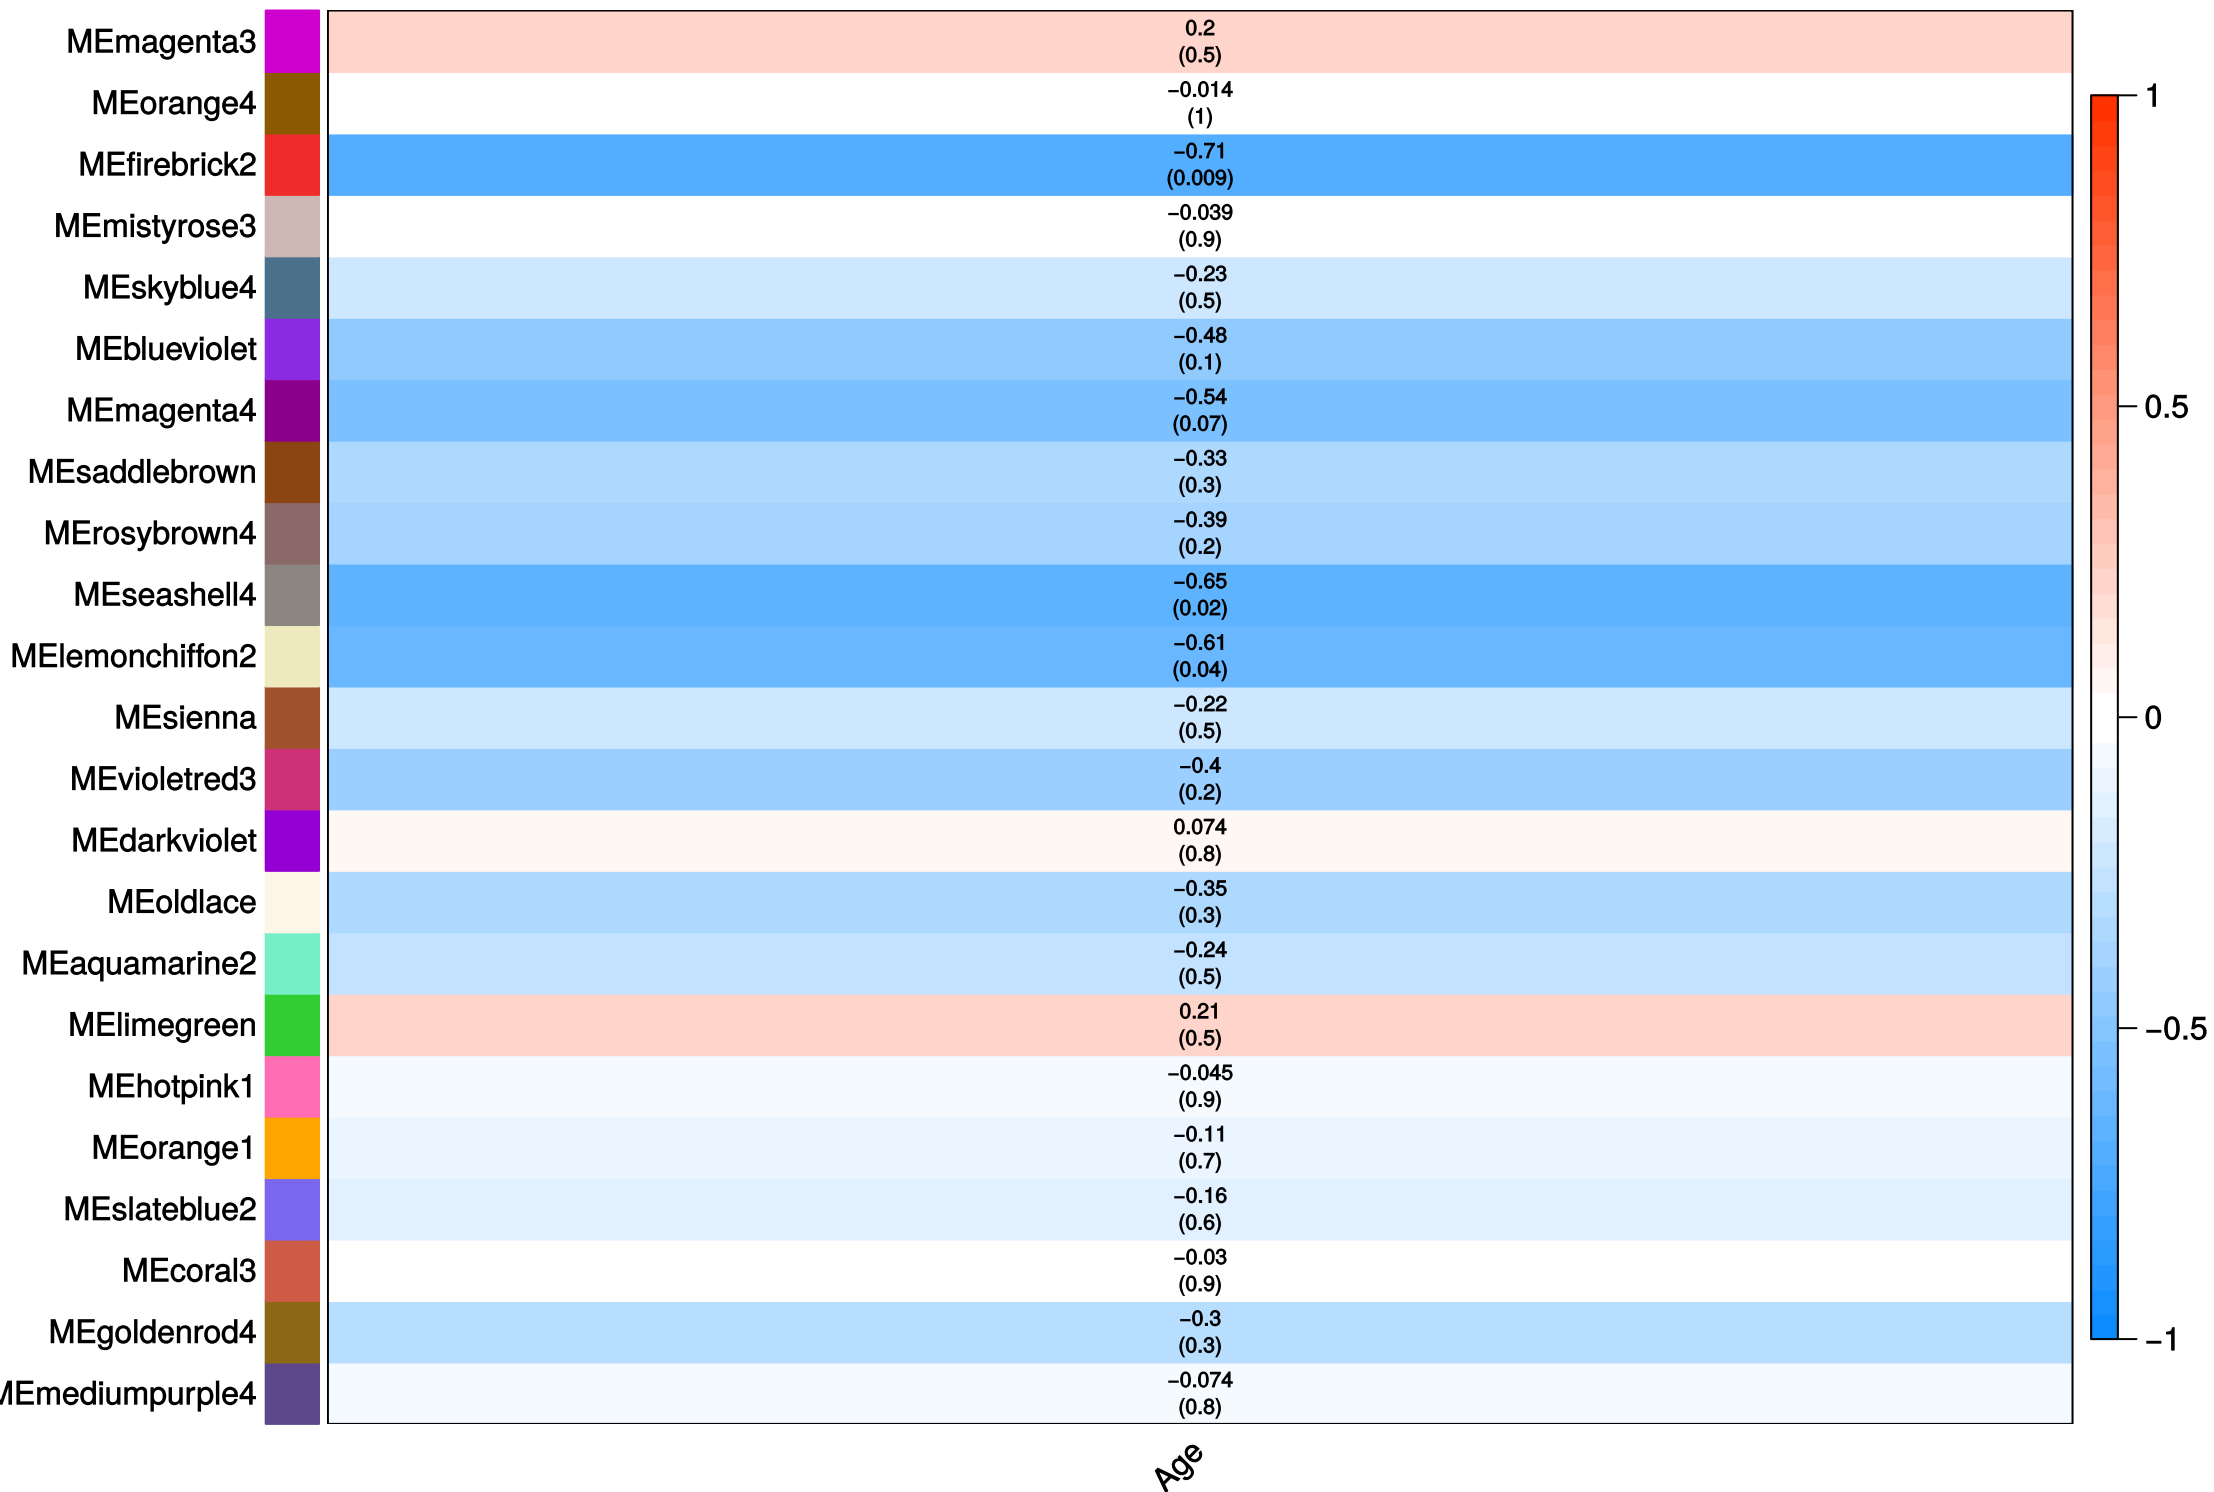

# WGCNA module-age associations - continued.

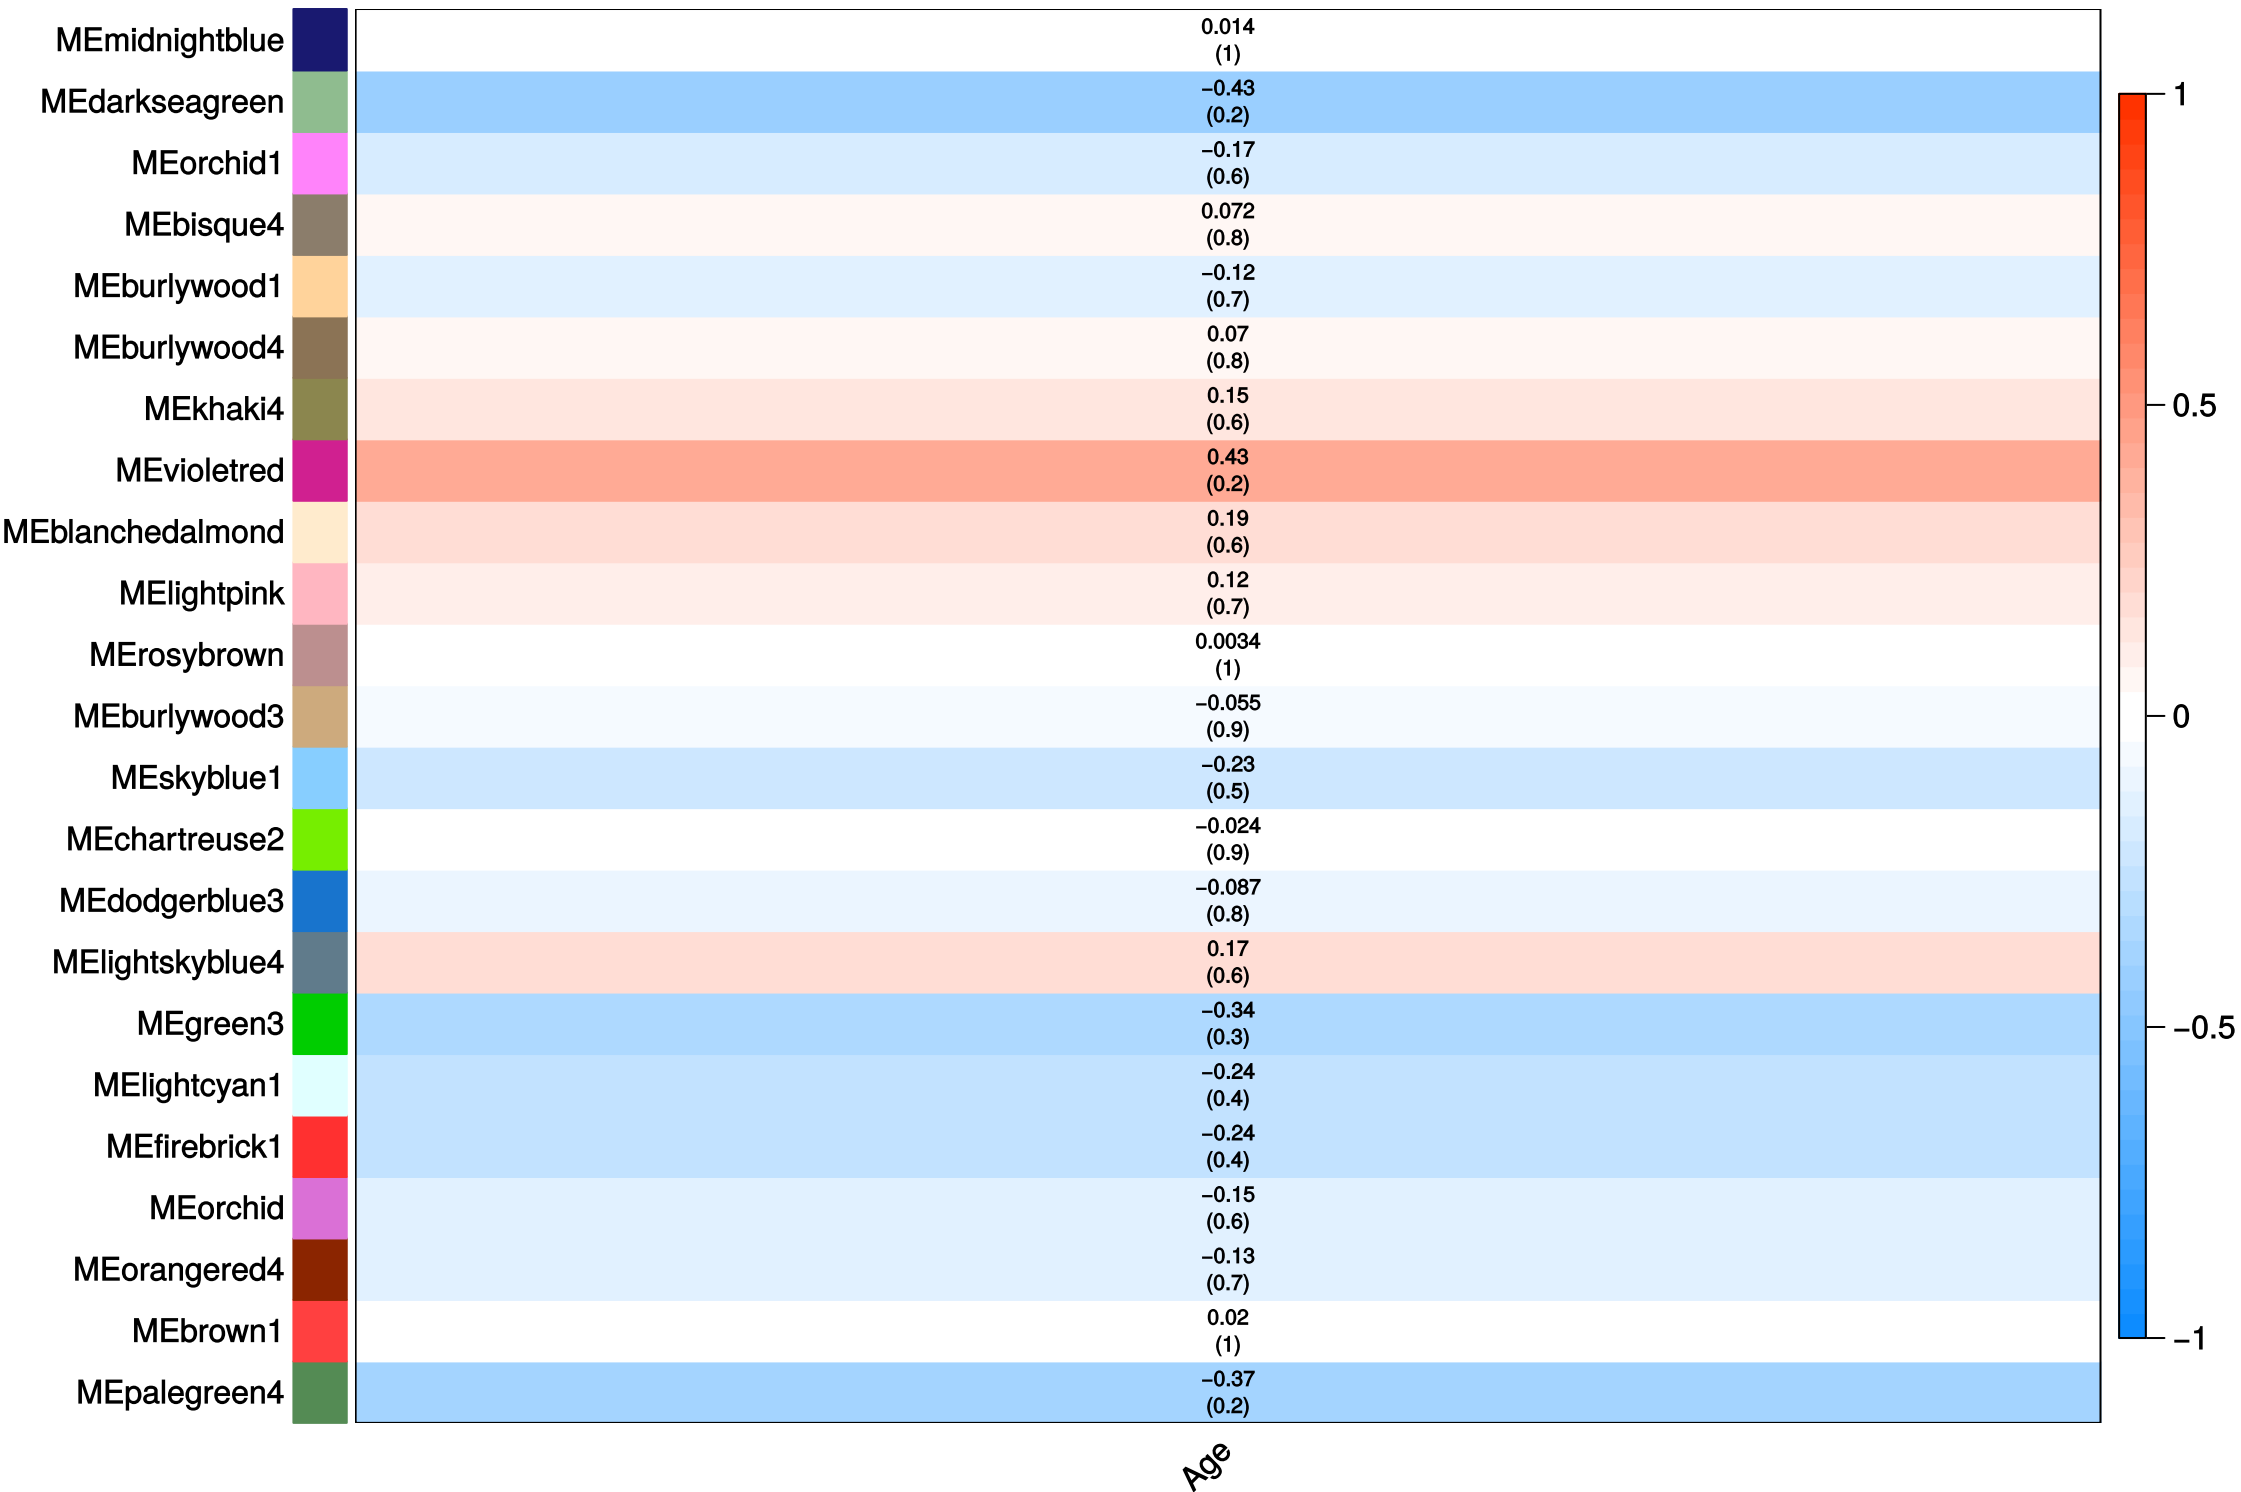

# WGCNA module-age associations - continued.

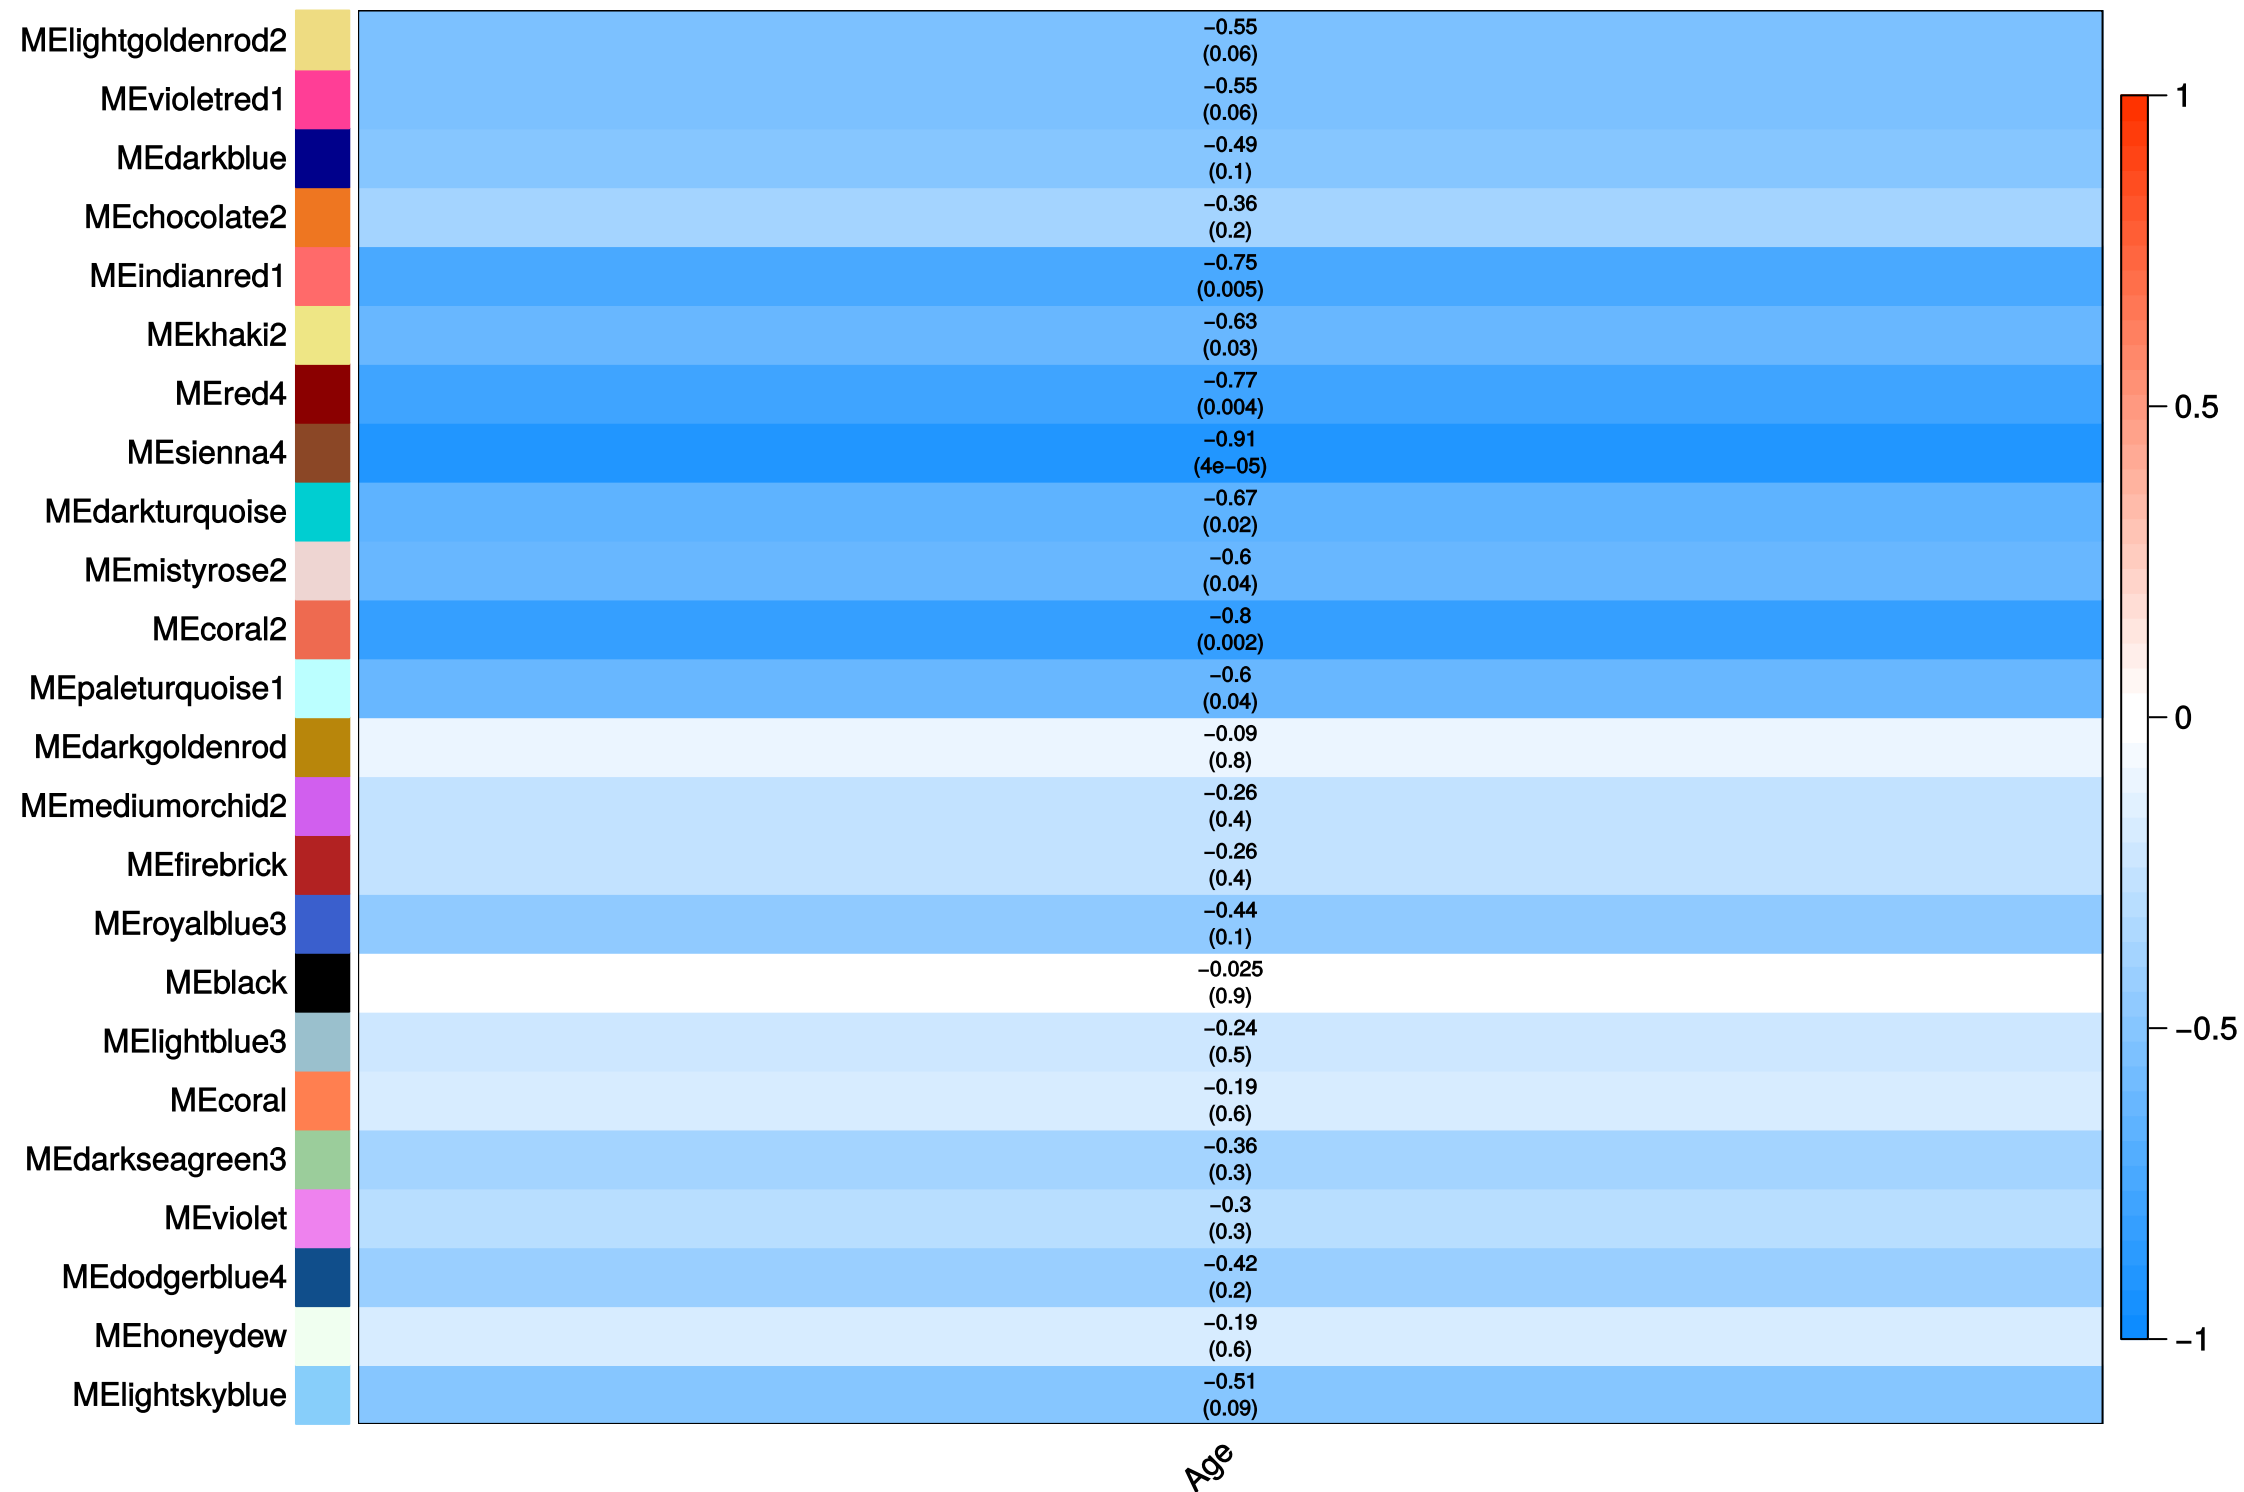



# WGCNA module-age associations - continued.

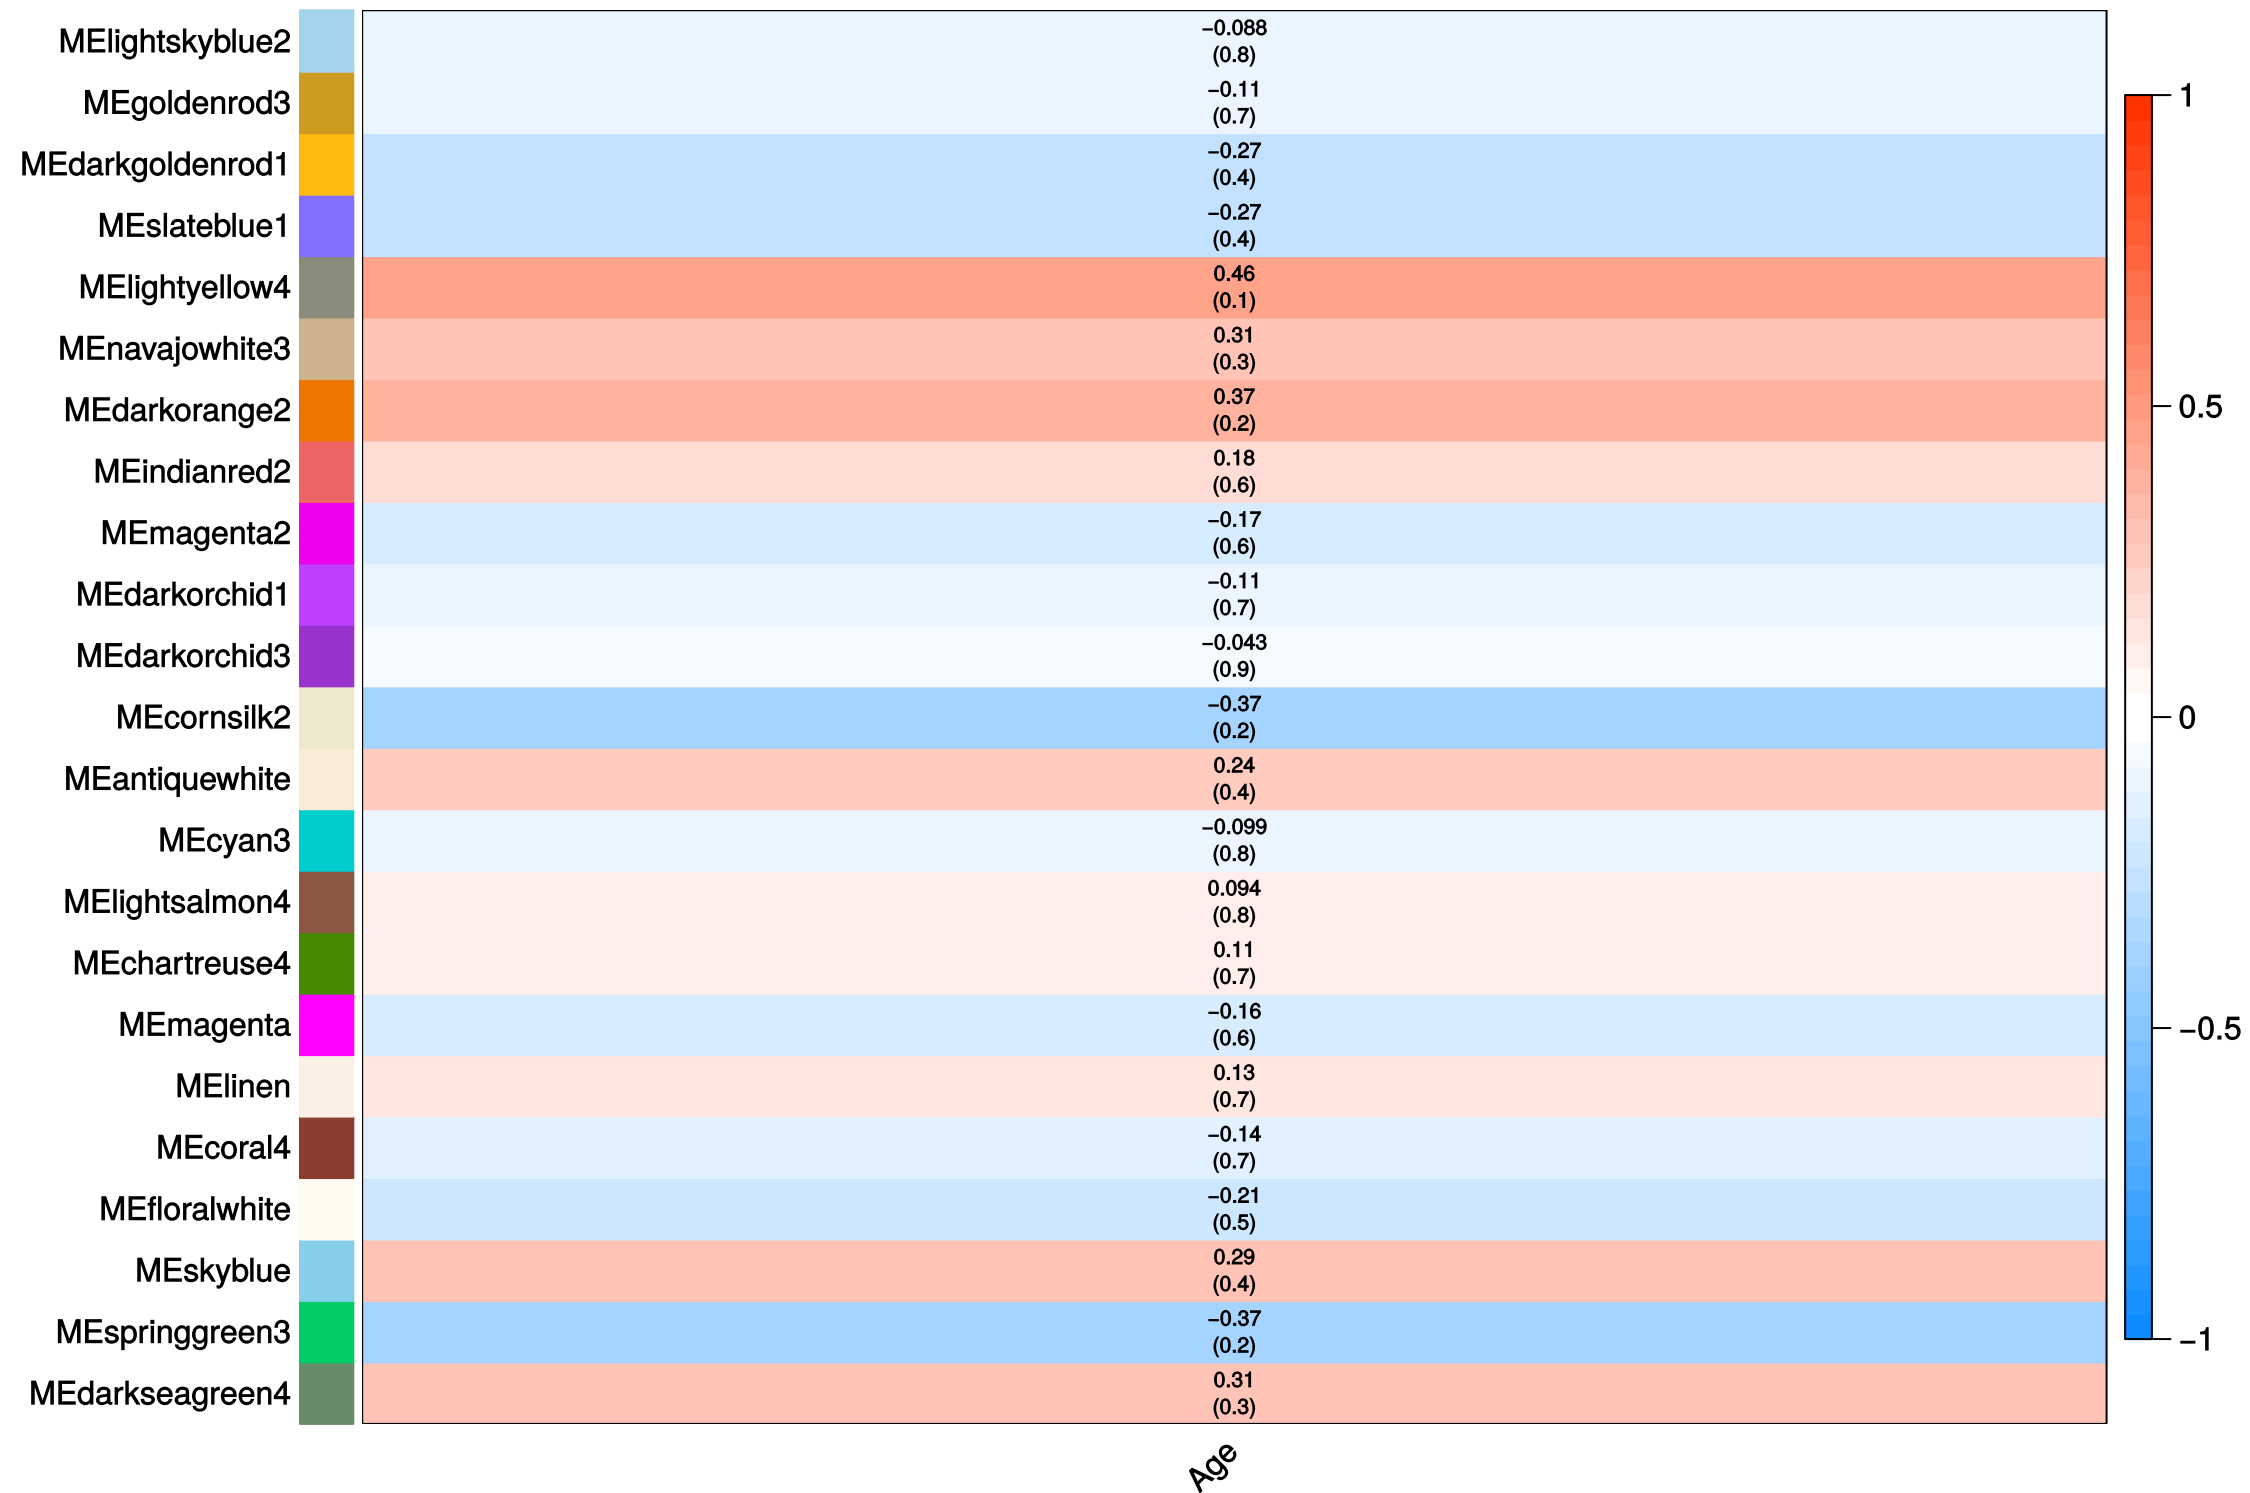

# WGCNA module-age associations - continued.

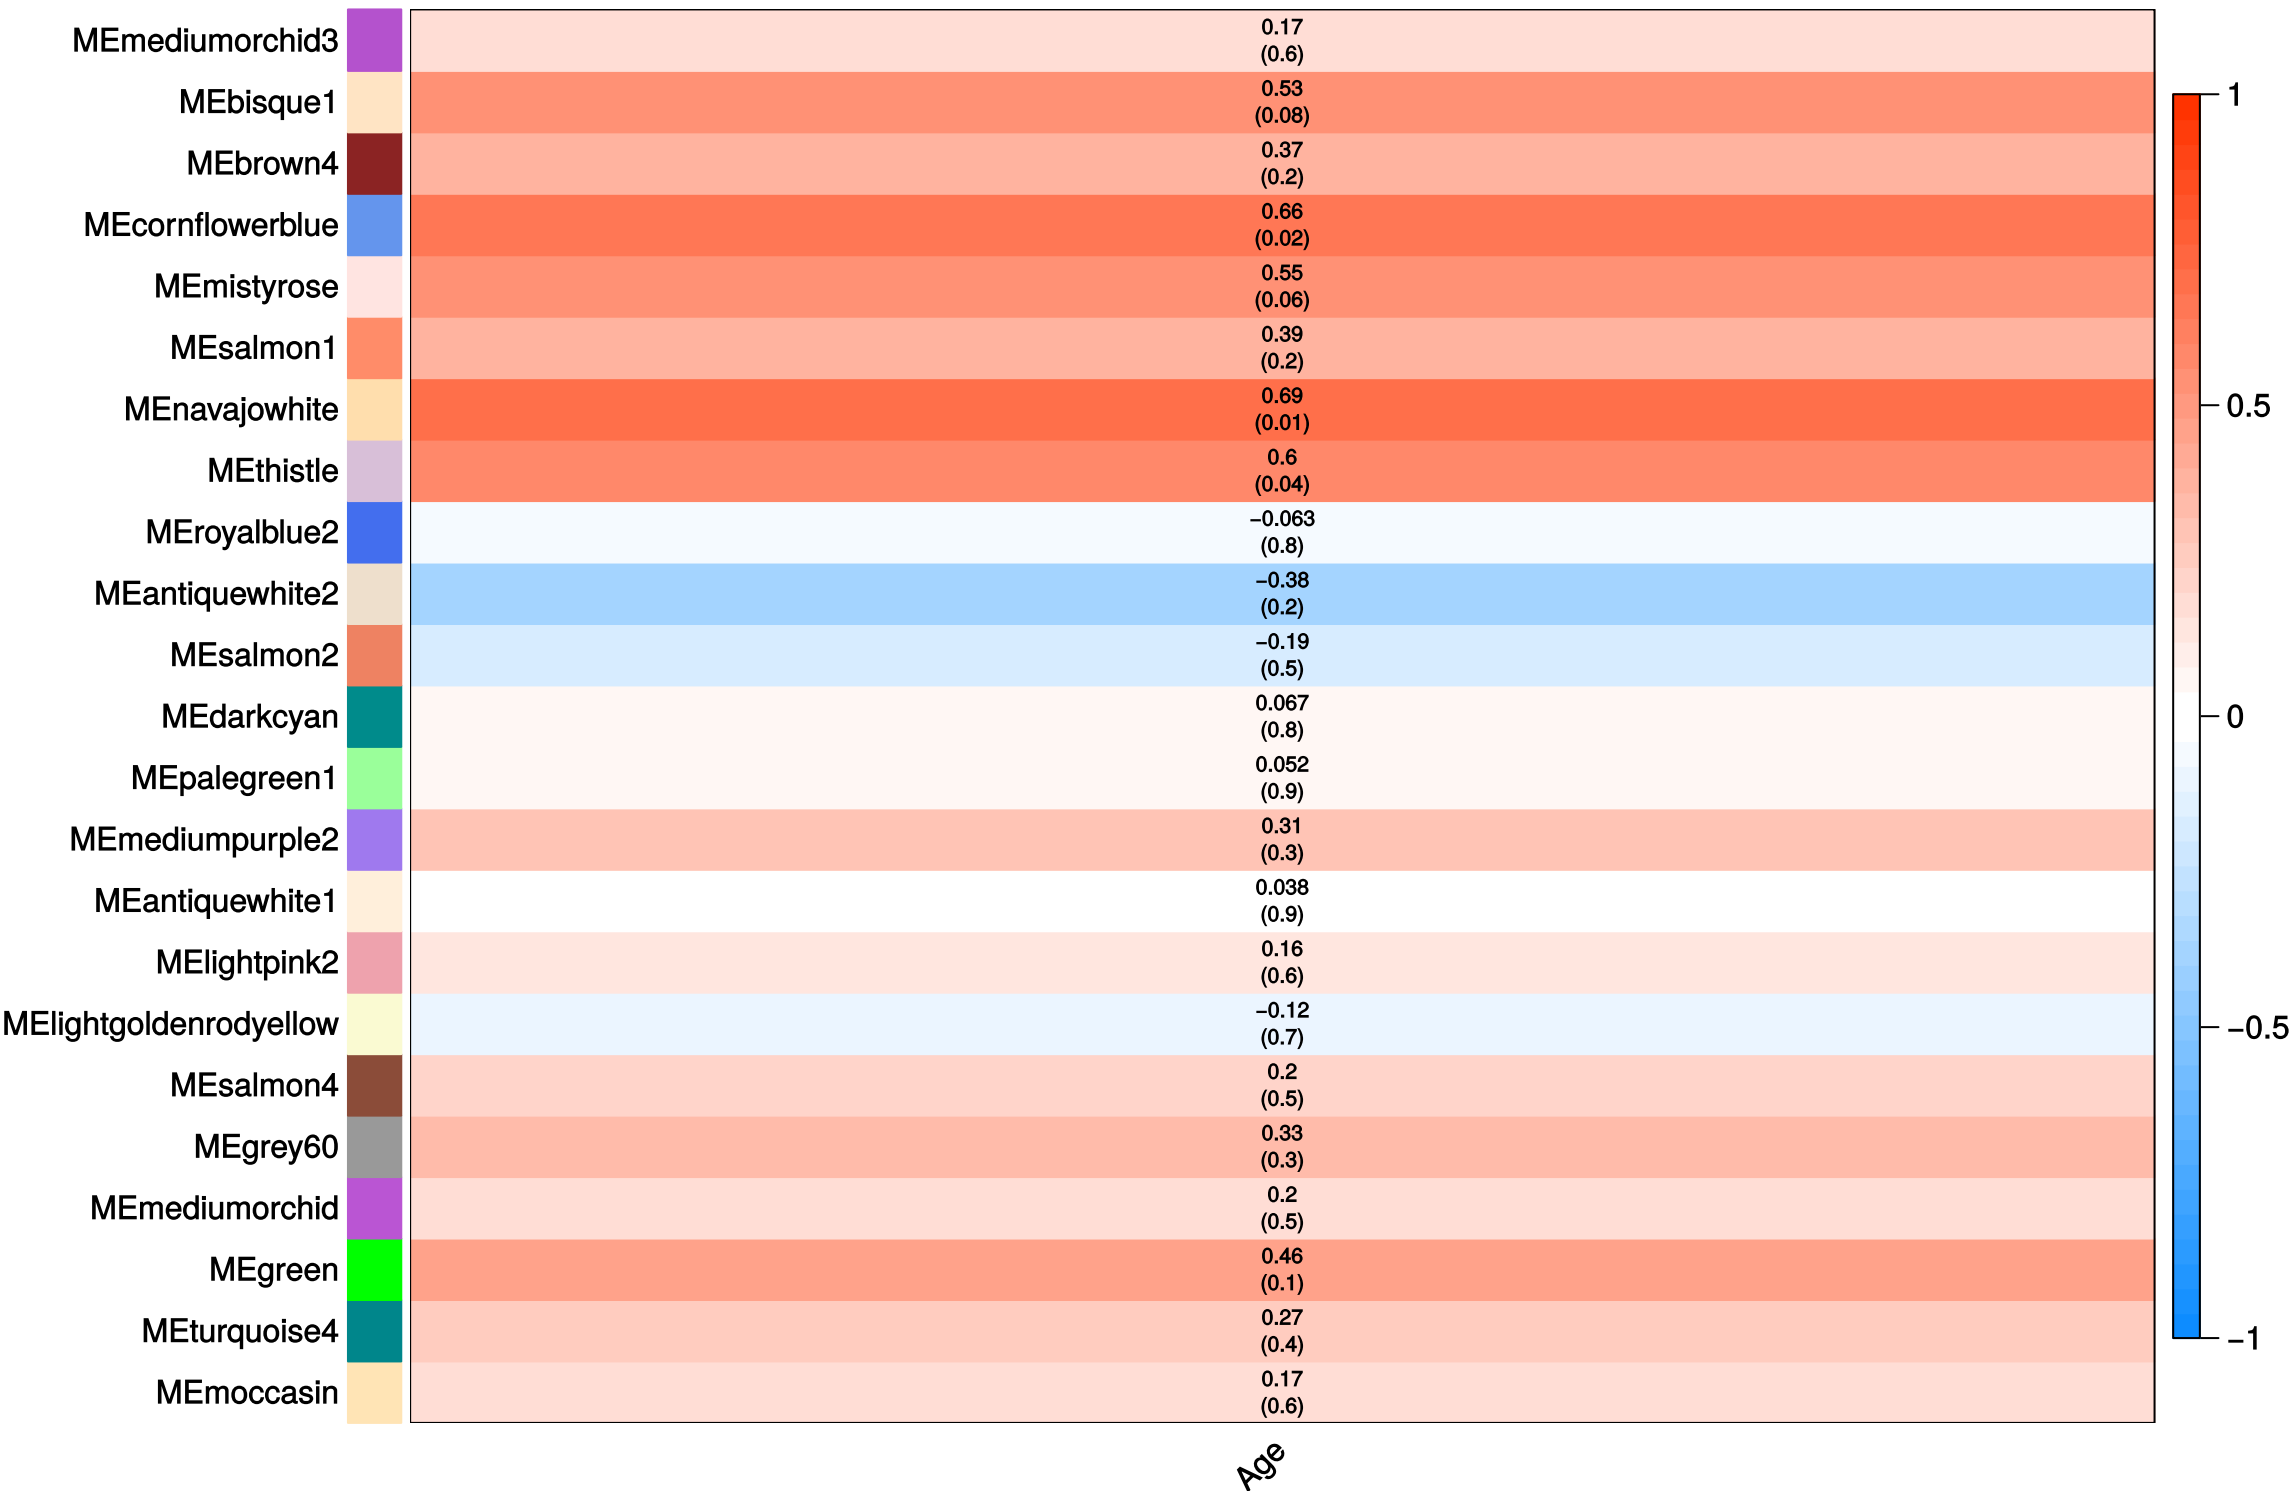

# WGCNA module-age associations - continued.

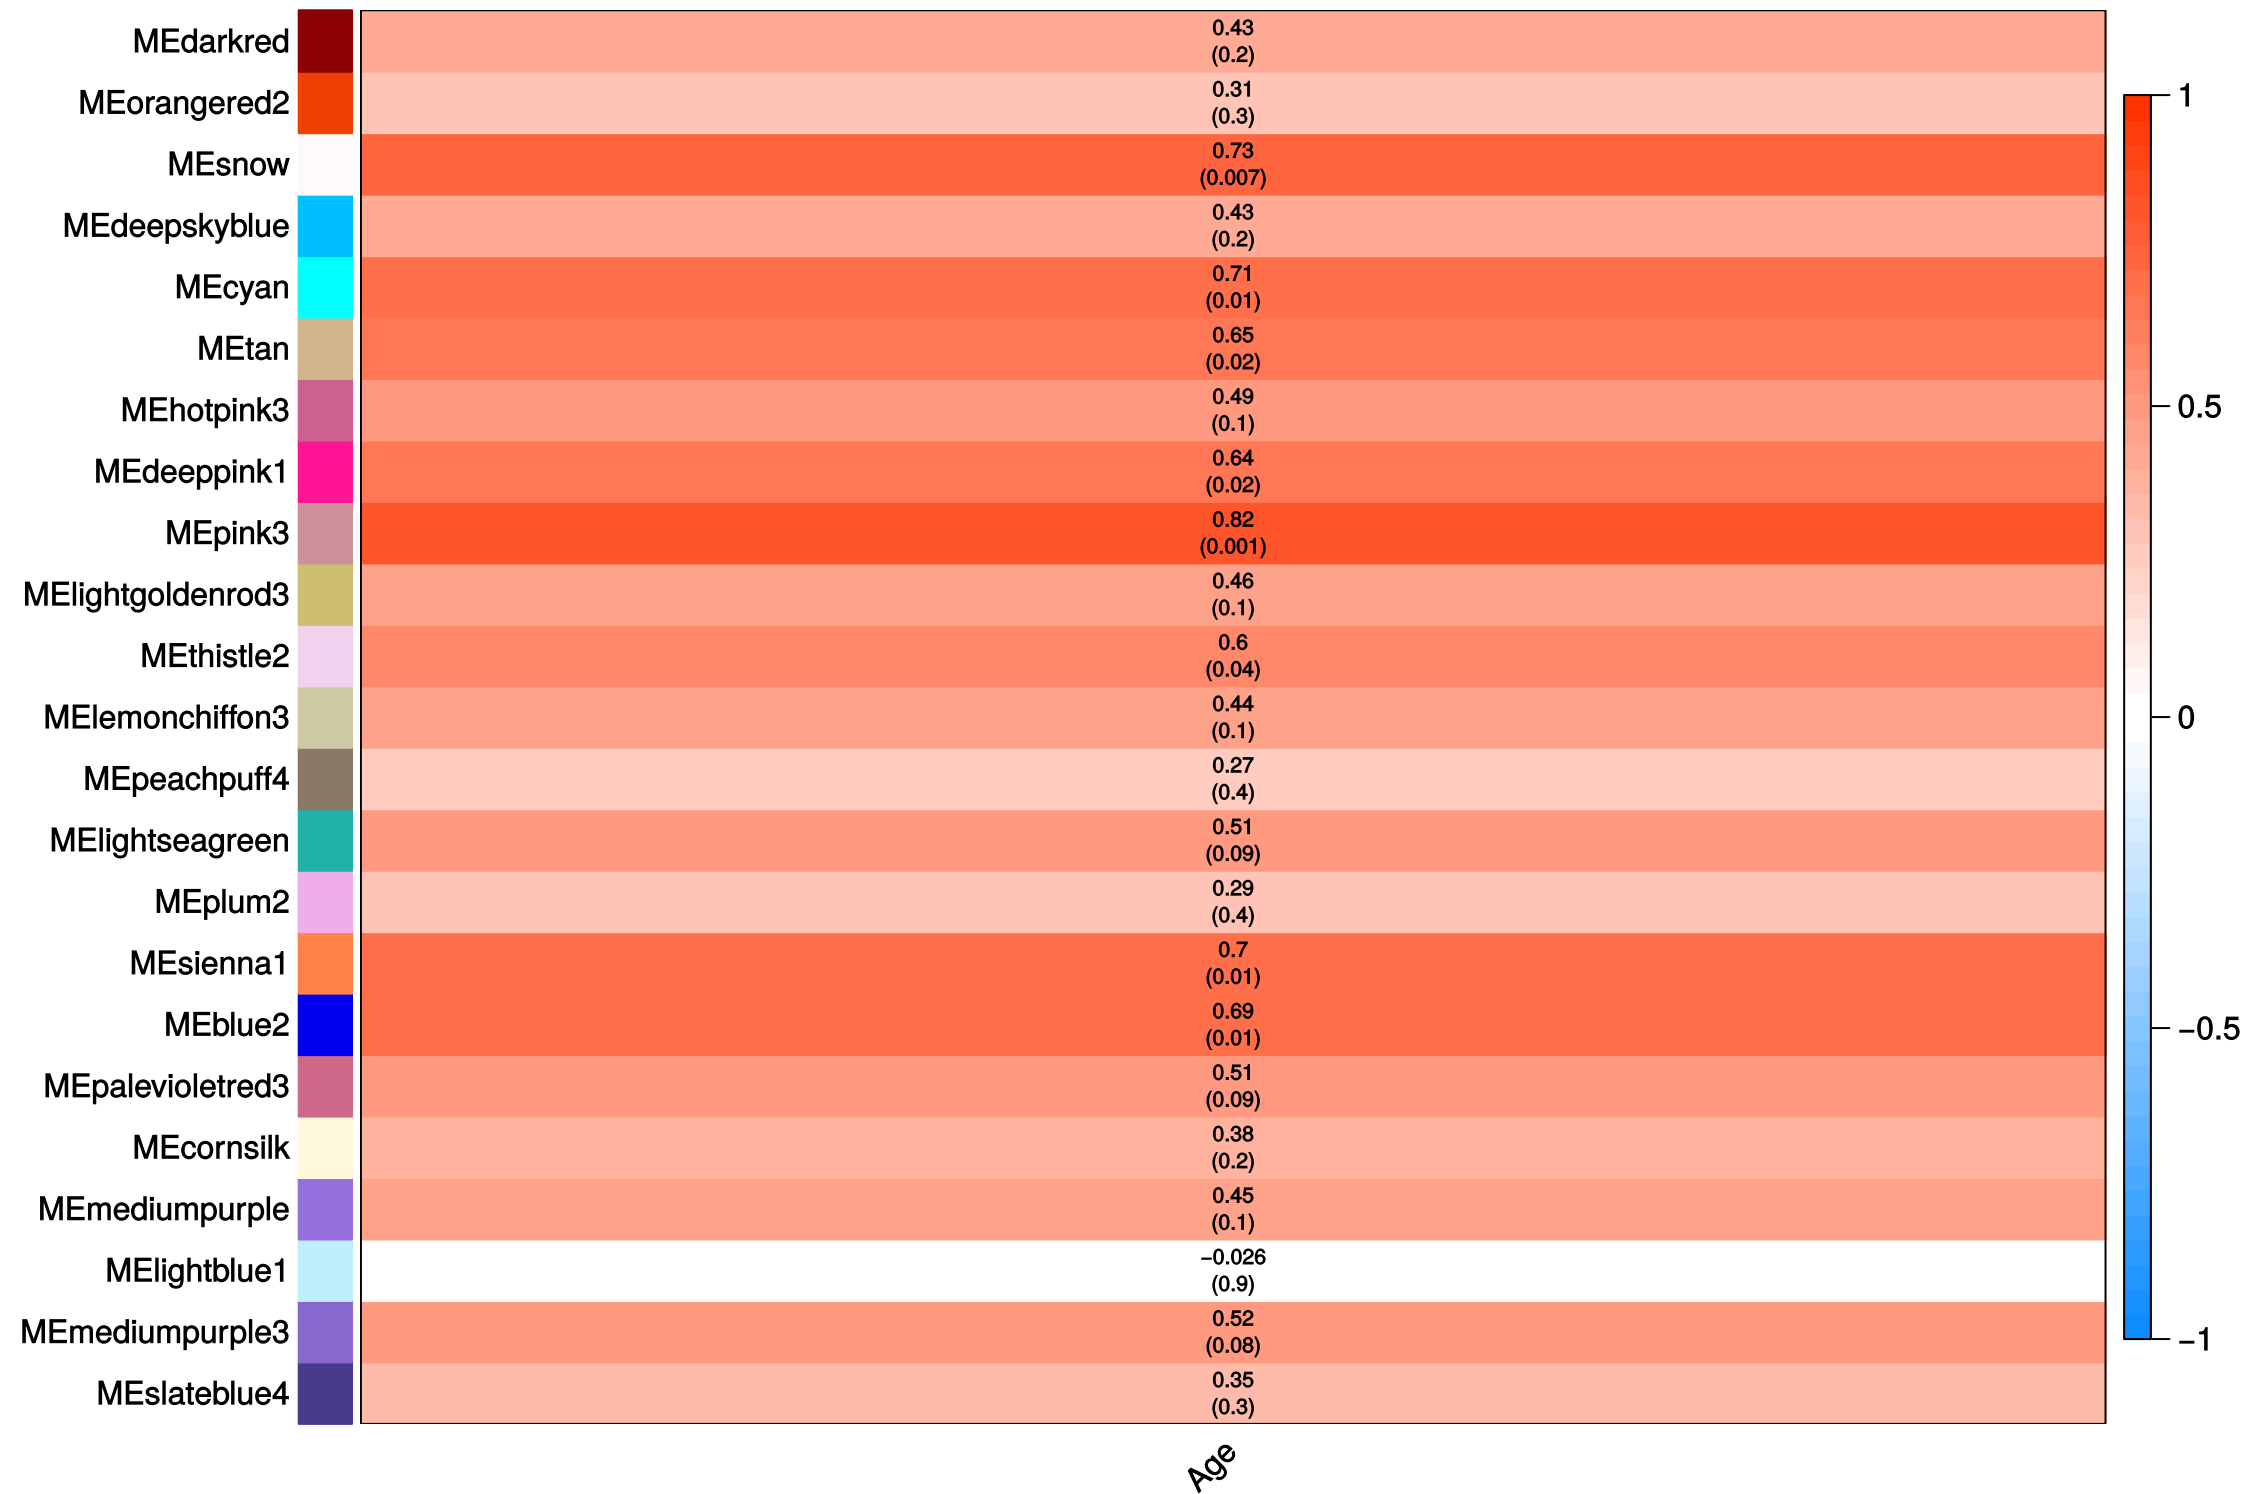

Supplement: 12864_2021_7649_MOESM3_ESM.pdf [file 12864_2021_7649_MOESM3_ESM.pdf]
